## **Title: Auxin-sensitive Aux/IAA proteins mediate drought tolerance in Arabidopsis by regulating glucosinolate levels**

**Authors:** M. Salehin<sup>1</sup>, B. Li<sup>2</sup>, M. Tang<sup>2</sup>, E. Katz<sup>2</sup>, L. Song<sup>3</sup>, J. R. Ecker<sup>3</sup>, D. Kliebenstein<sup>2</sup>, and M. Estelle<sup>1\*</sup>

### **Affiliations:**

<sup>1</sup>Section of Cell and Developmental Biology and Howard Hughes Medical Institute, University of California San Diego, La Jolla CA., 92093.

<sup>2</sup>Department of Plant Sciences, University of California Davis, Davis CA 95616.

<sup>3</sup> Genomic Analysis Laboratory, Howard Hughes Medical Institute and The Salk Institute for Biological Studies, La Jolla, CA 92037

\*Correspondence to: [mestelle@ucsd.edu](mailto:mestelle@ucsd.edu)

**Abstract:** A detailed understanding of abiotic stress tolerance in plants is essential to provide food security in the face of increasingly harsh climatic conditions. Glucosinolates (GLSs) are secondary metabolites found in the Brassicaceae that protect plants from herbivory and pathogen attack. Here we report that in Arabidopsis, aliphatic GLS levels are regulated by the auxin-sensitive Aux/IAA repressors IAA5, IAA6, and IAA19. These proteins act in a transcriptional cascade that maintains expression of GLS levels when plants are exposed to drought conditions. Loss of IAA5/6/19 results in reduced GLS levels and decreased drought tolerance. Further, we show that this phenotype is associated with a defect in stomatal regulation. Application of GLS to the *iaa5,6,19* mutants restores stomatal regulation and normal drought tolerance. GLS action is dependent on the receptor kinase GHR1, suggesting that GLS may signal via reactive oxygen species. These results provide a novel connection between auxin signaling, GLS levels and drought response.

**One Sentence Summary:** Aux/IAA proteins promote drought tolerance by regulating glucosinolate levels.

**Main Text:** The Aux/IAA transcriptional repressors have a central role in auxin signaling. In the presence of auxin, the Aux/IAs are degraded through the action of the ubiquitin E3-ligase SCF<sup>TIR1/AFB</sup>, resulting in de-repression of transcription by the AUXIN RESPONSE FACTOR (ARF) transcription factors (1, 2). Although the mechanisms of auxin perception and Aux/IAA degradation are well known, other aspects of Aux/IAA regulation remain poorly understood. In particular, the factors that regulate transcription of the *Aux/IAA*

genes are mostly unknown. Recently, we showed that three *Aux/IAA* genes, *IAA5*, *IAA6*, and *IAA19* are directly regulated by the DREB2A and DREB2B transcription factors and that recessive mutations in these *IAA* genes result in a decrease in drought tolerance (3).

To determine the molecular basis of the loss of drought tolerance in *iaa5*, *iaa6*, and *iaa19* mutant plants, we used RNAseq to identify genes that were differentially regulated in Col-0 vs. the *iaa5 iaa6 iaa19* (*iaa5,6,19*) triple mutant when exposed to desiccation stress (Table S1). A total of 651 genes were differentially expressed between the mutant and Col-0 under these conditions (FDR < 0.001), 439 down-regulated and 212 up-regulated. A gene ontology search revealed that 12 genes that function in the aliphatic glucosinolate (GLS) biosynthetic pathway are down-regulated in *iaa5,6,19* (Fig. 1A, B). In contrast, expression of these genes is not significantly affected by dehydration stress in Col-0. We confirmed these results by quantitative RT-PCR (qRT-PCR) (Fig. S1A).

Because the aliphatic GLS biosynthetic enzymes are down-regulated in *iaa5,6,19* mutants during drought stress, we wondered if the levels of GLSs were also affected. To test this, we measured GLS levels in stress treated Col-0 and *iaa5,6,19* mutants at time intervals. Indolic GLSs were unaltered (Table S2). However, the level of 4-methylsulfinyl glucosinolate (4-MSO), the most abundant aliphatic glucosinolate in Arabidopsis (Col-0), was sharply decreased in *iaa5, 6, 19* plants after 1 hr and 3 hr of desiccation (Fig. 1C). This data shows that down-regulation of aliphatic GLS biosynthetic enzymes in *iaa5, 6, 19* mutants results in decreased GLS levels.

GLSs are well known for their role in plant defense and innate immunity, although recent studies also suggest that they may have a role in regulating plant growth (4-8). These secondary metabolites are found primarily in the Brassicaceae, a family that includes many economically important crops (6). GLSs are broken down by the enzyme myrosinase into isothiocyanates and related compounds, which are toxic to insect herbivores and other plant pathogens (7-10). To determine if decreased drought tolerance in the *iaa5,6,19* mutant is related to reduced GLS levels, we measured the effects of mutations in GLS biosynthetic genes on response to drought. We employed two assays; growth of seedlings on agar medium containing PEG, and growth of plants in pots after withholding water. We first characterized mutants in the *CYP79F1* and *CYP79F2* genes, encoding enzymes that convert elongated methionine to aldoximes (Fig. 1A). Both mutants, as well as the double mutant, are less tolerant to both PEG treatment and water withholding (Fig. 2A, B; Fig. S2B, C). Similarly, loss of *CYP83A1*, responsible for conversion of aldoximes to *aci*-Nitro compounds, results in reduced tolerance to water withholding in pots (Fig. S2D). These results indicate that loss of aliphatic GLS compounds results in decreased drought tolerance, providing an explanation for the phenotype of the *iaa5,6,19* mutant.

The MYB28 and MYB29 transcription factors are known to regulate genes in the aliphatic GLS biosynthetic pathway, including the *CYP79F1/F2* and *CYP83A1* genes (11-14). Indeed, aliphatic GLS levels in the *myb28 myb29* double mutant are extremely low, whereas over-expression of

either *MYB28* or *MYB29* results in elevated aliphatic GLS levels (12-15). Thus, it is possible that the effects of the *iaa5,6,19* mutations on the pathway are mediated by changes in expression of these transcription factor genes. Examination of our RNAseq data revealed that *MYB28* is down-regulated in the triple mutant in response to stress. *MYB29* is expressed at a very low level in seedlings. We confirmed this by qRT-PCR (Fig. S1). When we determined the response of the *myb28 myb29* double mutant to water withholding we found that it is less tolerant than the wild type, further support for the idea and GLSs are required for drought tolerance (Fig. 2C; Fig. S3A). Since overexpression of *MYB28* and *MYB29* increases GLS levels, we also tested the behavior of these lines in our assays. Strikingly, we found that both lines displayed strongly increased drought tolerance (Fig. 2D, Fig. S3B) further confirming that GLSs confer drought tolerance. We also tested the effect of over-expression of the *AOP2* gene on drought tolerance. Over-expression of this gene in Col-0 results in an increase in aliphatic GLS levels, although less than in lines over-expressing *MYB28* (16). The results in Fig 2D and Fig. S3B show that increased *AOP2* levels results in a modest but statistically significant increase in drought tolerance.

If decreased drought tolerance in *iaa5,6,19* plants is due to a GLS deficiency then over-expression of *MYB28* or *MYB29* in the triple mutant may ameliorate the effects of the mutations. Indeed, when we cross the *35S:MYB28* or *35S:MYB29* transgene into the *iaa19-1* mutant the result is the restoration of wild-type levels of drought tolerance to the mutant line (Figure 2E).

Although *IAA5*, *6*, and *19* are required for expression of *MYB28*, they are unlikely to directly regulate *MYB28* because they are transcriptional repressors (1). To identify transcription factors that might be direct targets of the Aux/IAAs, and that might regulate *MYB28* expression, we searched our RNAseq data for factors that are up-regulated in the triple mutant in response to stress. One interesting candidate was *WRKY63*, also known as *ABA OVERLY SENSITIVE3 (abo3)*(17). The *abo3* mutant was originally isolated because it is hypersensitive to ABA in seedlings. Our qRT-PCR experiments confirmed that *WRKY63* is up-regulated in response to dehydration in the triple mutant compared to the wild type (Fig. 3A). Examination of the promoter region of the *WRKY63* gene revealed the presence of two tandemly repeated *AuxRE* elements (-350 to -361), known to bind ARF transcription factors (2). To determine if *IAA19* binds to these sequences, we performed a ChIP-PCR analysis using a *rAA19-YPet-His-FLAG* line. The results, shown in Fig 3B, show that recovery of *AuxRE* sequences is significantly enriched in the IP from *rIAA19-YPet-His-FLAG* compared to the control indicating that *IAA19* binds to this sequence, presumably indirectly through an interaction with an ARF transcription factor.

To determine if *WRKY63* might regulate *MYB28/29* expression, we measured RNA levels in two *35S:WRKY63* lines by qRT-PCR and found that expression of both genes was reduced suggesting that *WRKY63* acts to repress expression of the *MYB* genes (Fig 3C) (18). Finally, we

measured drought tolerance of the *35S:WRKY63* lines as well as the knockout mutant *wrky63-1*. As shown in Fig. 3D and Fig. S3B, the mutant has a normal response to water withholding. However, both over-expression lines are less drought tolerant consistent with reduced expression of *MYB28/29*. We note that *WRKY63* is a member of small clade of 4 genes. It is possible that these genes have an overlapping function in regulation of *MYB28/29*. We note that our analysis of *WRKY63* differs from the earlier work showing that the *abol* mutant is less drought tolerance (17). The reason for this discrepancy is unclear.

In considering how aliphatic GLSs may regulate drought response, we noted that these compounds have been reported to promote stomatal closure. In addition, the myrosinase TGG1 is one of the most abundant proteins in Arabidopsis guard cells suggesting that GLS compounds may have an important role in guard cell function (19). Further, isothiocyanate, a GLS metabolite, closes stomata in Arabidopsis (20, 21). To determine if a defect in stomatal regulation might be responsible for reduced drought tolerance in the *iaa5,6,19* and *myb28 myb29* lines, we first examined the stomatal response to drought in epidermal peels. As expected, the stomata on Col-0 plants close in response to drought conditions (Fig. 4A). In contrast, the stomata on both mutant lines failed to respond. We next asked whether application of 4-MSO would promote stomatal closure in wild-type and mutant plants. As a control we also applied abscisic acid (ABA) The results shown in Fig. 4B demonstrate that all three genotypes respond to both ABA and 4-MSO. We further tested the effects of 4-MSO on light-induced opening of stomata from dark-adapted plants. The results in Fig 4C show that 4-MSO inhibits this response in Col-0 and *iaa5,6,19* plants. These results suggest that the primary basis for reduced drought tolerance in the *iaa5,6,19* line is failure to close stomata in drought conditions. To test this possibility, we applied 4-MSO to wild-type and mutant plants subjected to water withholding in pots. The results in Fig. 4D and Fig. S2A show that application of this GLS restores drought tolerance in the mutant to wild-type levels.

To determine if all GLS compounds promote stomatal closure, we applied indol-3-ylmethylglucosinolate (I3M), an indolic GLS that is abundant in Arabidopsis, to Col-0. The results in Fig. 4C demonstrate that I3M is unable to inhibit light-induced stomatal opening in either Col-0 or the triple mutant, indicating that not all glucosinolates have the same efficacy. Similar results were obtained in an experiment where we tested the ability of I3M to promote stomatal closure in light grown plants (Fig 4E). We also tested a second aliphatic GLS, sinigrin hydrate (SH) that is abundant in many Arabidopsis ecotypes, although not Col-0 (22). Like 4-MSO, SH promoted closure in Col-0 and in the *abi1-1* mutant (Fig S3C). Thus, it is possible that this activity is restricted to aliphatic GLS compounds, although additional studies are required to explore this possibility further.

ABA is known to play a key role in stomatal regulation (23). We investigated potential interactions between GLS and ABA by testing the response of *iaa5,6,19* to ABA treatment. The

results in Fig. 4B show that the mutant line does respond to ABA, indicating that GLS is not required for the ABA response. Further, we found that the *abil* mutant, which is deficient in ABA regulation of stomatal closure, has a normal response to GLS (Fig. 4F) (23). These results suggest that GLS and ABA can act independently to regulate stomata. This is consistent with a recent study showing that GLS and ABA have an additive effect on stomatal closure (24).

Reactive oxygen species (ROS) play an important role in stomatal regulation. One of the effects of ABA is to stimulate production of extracellular ROS through the RESPIRATORY BURST OXIDASE HOMOLOG D (RBOHD)(23). Extracellular ROS then acts through the receptor kinase GUARD CELL HYDROGEN PEROXIDE-RESISTANT 1 (GHR1) to regulate the SLOW ANION ACTIVATING CHANNEL 1(23). Since isothiocyanates (ITC), products of GLS metabolism, are known to promote stomatal closure via ROS, we wondered if GHR1 is required for response to GLS(21). The results in Fig. 4G show that the *grh1* mutant is resistant to the effects of 4-MSO on stomata indicating that GLS likely acts through production of ROS.

Since loss of the auxin-sensitive repressors IAA5, IAA6, and IAA19 in the *iaa5,6,19* results in decreased expression of GLS biosynthetic genes, we predict that the reduction in the levels of these proteins after auxin treatment would have the same effect. Indeed, treatment of seedlings with 10  $\mu$ M IAA for 2 hours results in reduced expression of the GLS genes (Fig. S3D). Further, we predict that mutations which stabilize the Aux/IAA proteins will increase both GLS levels and drought tolerance. The TIR1/AFB family of auxin co-receptors consists of 6 members in Arabidopsis that act in an overlapping fashion to regulate auxin-dependent transcription throughout the plant. To determine the role of the TIR1/AFBs in GLS regulation we measured GLS levels in two higher order *tir1/afb* lines, *afb1,3,4,5* and *afb2,3,4,5* (25). Both lines had significantly higher GLS levels than either Col-0 or *iaa5,6,19* in 7-day-old seedlings (Fig. 4H). After one hour of desiccation, GLS levels dropped in all three mutant genotypes. In the case of the *iaa5,6,19* line, GLS levels were much lower than Col-0, while in *afb1,3,4,5* and *afb2,3,4,5*, levels were similar to Col-0. We also determined the effects of water withholding on these genotypes. The results in Fig 4I and Fig. S3E show that both *afb* lines are significantly more drought tolerant than Col-0.

The major plant hormones are all secondary metabolites with ancient signaling functions. Here we show that GLSs also act as chemical signals that regulate stomatal aperture during drought stress. Desiccation results in a rapid decrease in auxin response in seedlings, an effect that probably results in decreased growth(3). By utilizing auxin to regulate stomatal aperture, the plant may integrate growth and stomatal regulation in drought conditions.

## References and Notes

- 1.M. Salehin, R. Bagchi, M. Estelle, SCFTIR1/AFB-Based Auxin Perception: Mechanism and Role in Plant Growth and Development. *Plant Cell* **27**, 9-19 (2015).
- 2.D. Weijers, D. Wagner, Transcriptional Responses to the Auxin Hormone. *Annual review of plant biology* **67**, 539 (2016).
- 3.E. Shani *et al.*, Plant stress tolerance requires auxin-sensitive Aux/IAA transcriptional repressors. *Current Biology*. *Current Biology* **27**, 437-444 (2017).

- 4.E. Katz *et al.*, The glucosinolate breakdown product indole-3-carbinol acts as an auxin antagonist in roots of *Arabidopsis thaliana*. *Plant J* **82**, 547-555 (2015).
- 5.F. G. Malinovsky *et al.*, An evolutionarily young defense metabolite influences the root growth of plants via the ancient TOR signaling pathway. *Elife* **6**, (2017).
- 6.B. A. Halkier, J. Gershenzon, Biology and biochemistry of glucosinolates. *Annu Rev Plant Biol* **57**, 303-333 (2006).
- 7.P. Bednarek *et al.*, A glucosinolate metabolism pathway in living plant cells mediates broad-spectrum antifungal defense. *Science* **323**, 101-106 (2009).
- 8.N. K. Clay, A. M. Adio, C. Denoux, G. Jander, F. M. Ausubel, Glucosinolate metabolites required for an *Arabidopsis* innate immune response. *Science* **323**, 95-101 (2009).
- 9.U. Wittstock, J. Gershenzon, Constitutive plant toxins and their role in defense against herbivores and pathogens. *Curr Opin Plant Biol* **5**, 300-307 (2002).
- 10.J. Fan *et al.*, *Pseudomonas sax* genes overcome aliphatic isothiocyanate-mediated non-host resistance in *Arabidopsis*. *Science* **331**, 1185-1188 (2011).
- 11.T. Gigolashvili, M. Engqvist, R. Yatusевич, C. Müller, U. I. Flügge, HAG2/MYB76 and HAG3/MYB29 exert a specific and coordinated control on the regulation of aliphatic glucosinolate biosynthesis in *Arabidopsis thaliana*. *New Phytol* **177**, 627-642 (2008).
- 12.T. Gigolashvili, R. Yatusевич, B. Berger, C. Müller, U. I. Flügge, The R2R3-MYB transcription factor HAG1/MYB28 is a regulator of methionine-derived glucosinolate biosynthesis in *Arabidopsis thaliana*. *Plant J* **51**, 247-261 (2007).
- 13.I. E. Sønderby, M. Burow, H. C. Rowe, D. J. Kliebenstein, B. A. Halkier, A complex interplay of three R2R3 MYB transcription factors determines the profile of aliphatic glucosinolates in *Arabidopsis*. *Plant Physiol* **153**, 348-363 (2010).
- 14.M. Y. Hirai *et al.*, Omics-based identification of *Arabidopsis* Myb transcription factors regulating aliphatic glucosinolate biosynthesis. *Proc Natl Acad Sci U S A* **104**, 6478-6483 (2007).
- 15.I. E. Sønderby *et al.*, A systems biology approach identifies a R2R3 MYB gene subfamily with distinct and overlapping functions in regulation of aliphatic glucosinolates. *PLoS One* **2**, e1322 (2007).
- 16.A. M. Wentzell *et al.*, Linking metabolic QTLs with network and cis-eQTLs controlling biosynthetic pathways. *PLoS Genet* **3**, 1687-1701 (2007).
- 17.X. Ren *et al.*, ABO3, a WRKY transcription factor, mediates plant responses to abscisic acid and drought tolerance in *Arabidopsis*. *Plant J* **63**, 417-429 (2010).
- 18.O. Van Aken, B. Zhang, S. Law, R. Narsai, J. Whelan, AtWRKY40 and AtWRKY63 modulate the expression of stress-responsive nuclear genes encoding mitochondrial and chloroplast proteins. *Plant Physiol* **162**, 254-271 (2013).
- 19.Z. Zhao, W. Zhang, B. A. Stanley, S. M. Assmann, Functional proteomics of *Arabidopsis thaliana* guard cells uncovers new stomatal signaling pathways. *Plant Cell* **20**, 3210-3226 (2008).
- 20.M. S. Hossain *et al.*, Glucosinolate degradation products, isothiocyanates, nitriles, and thiocyanates, induce stomatal closure accompanied by peroxidase-mediated reactive oxygen species production in *Arabidopsis thaliana*. *Biosci Biotechnol Biochem* **77**, 977-983 (2013).
- 21.M. A. Khokon *et al.*, Allyl isothiocyanate (AITC) induces stomatal closure in *Arabidopsis*. *Plant Cell Environ* **34**, 1900-1906 (2011).
- 22.M. Francisco *et al.*, The Defense Metabolite, Allyl Glucosinolate, Modulates *Arabidopsis thaliana* Biomass Dependent upon the Endogenous Glucosinolate Pathway. *Front Plant Sci* **7**, 774 (2016).
- 23.S. Munemasa *et al.*, Mechanisms of abscisic acid-mediated control of stomatal aperture. *Curr Opin Plant Biol* **28**, 154-162 (2015).
- 24.M. Zhu, S. M. Assmann, Metabolic Signatures in Response to Abscisic Acid (ABA) Treatment in *Brassica napus* Guard Cells Revealed by Metabolomics. *Sci Rep* **7**, 12875 (2017).
- 25.M. J. Prigge, N. Kadakia, K. Greenham, M. Estelle. (bioRxiv, 2019).
- 26.I. E. Sønderby *et al.*, A systems biology approach identifies a R2R3 MYB gene subfamily with distinct and overlapping functions in regulation of aliphatic glucosinolates. *PLoS One* **2**, e1322 (2007).

27. O. Van Aken, B. Zhang, S. Law, R. Narsai, J. Whelan, AtWRKY40 and AtWRKY63 modulate the expression of stress-responsive nuclear genes encoding mitochondrial and chloroplast proteins. *Plant Physiol* **162**, 254-271 (2013).
28. J. Leung *et al.*, Arabidopsis ABA response gene AB11: features of a calcium-modulated protein phosphatase. *Science* **264**, 1448-1452 (1994).
29. D. Hua *et al.*, A plasma membrane receptor kinase, GHR1, mediates abscisic acid- and hydrogen peroxide-regulated stomatal movement in Arabidopsis. *Plant Cell* **24**, 2546-2561 (2012).
30. J. M. Alonso, A. N. Stepanova, A recombineering-based gene tagging system for Arabidopsis. *Methods Mol Biol* **1227**, 233-243 (2015).
31. S. J. Clough, A. F. Bent, Floral dip: a simplified method for Agrobacterium-mediated transformation of Arabidopsis thaliana. *Plant J* **16**, 735-743 (1998).
32. M. I. Love, W. Huber, S. Anders, Moderated estimation of fold change and dispersion for RNA-seq data with DESeq2. *Genome Biol* **15**, 550 (2014).
33. H. Mi *et al.*, PANTHER version 11: expanded annotation data from Gene Ontology and Reactome pathways, and data analysis tool enhancements. *Nucleic Acids Res* **45**, D183-D189 (2017).
34. M. Ashburner *et al.*, Gene ontology: tool for the unification of biology. The Gene Ontology Consortium. *Nat Genet* **25**, 25-29 (2000).
35. The Gene Ontology Consortium, Expansion of the Gene Ontology knowledgebase and resources. *Nucleic Acids Res* **45**, D331-D338 (2017).
36. T. D. Schmittgen, K. J. Livak, Analyzing real-time PCR data by the comparative C(T) method. *Nat Protoc* **3**, 1101-1108 (2008).
37. E. J. Chapman *et al.*, Hypocotyl transcriptome reveals auxin regulation of growth-promoting genes through GA-dependent and -independent pathways. *PLoS One* **7**, e36210 (2012).
38. D. J. Kliebenstein *et al.*, Genetic control of natural variation in Arabidopsis glucosinolate accumulation. *Plant Physiol* **126**, 811-825 (2001).
39. L. S. Bates, R. P. Waldren, I. D. Teare, Rapid Determination of free proline for water-stress studies. *Plant Soil* **39**, 205-207 (1973).
40. G. B. Bhaskara, T. H. Yang, P. E. Verslues, Dynamic proline metabolism: importance and regulation in water limited environments. *Front Plant Sci* **6**, 484 (2015).
41. Z. Zhao, W. Zhang, B. A. Stanley, S. M. Assmann, Functional proteomics of Arabidopsis thaliana guard cells uncovers new stomatal signaling pathways. *Plant Cell* **20**, 3210-3226 (2008).
42. L. M. Fan *et al.*, Abscisic acid regulation of guard-cell K<sup>+</sup> and anion channels in Gbeta- and RGS-deficient Arabidopsis lines. *Proc Natl Acad Sci U S A* **105**, 8476-8481 (2008).
43. S. Munemasa *et al.*, Mechanisms of abscisic acid-mediated control of stomatal aperture *Curr Opin Plant Biol.* 2015 Dec;28:154-62. doi: 10.1016/j.pbi.2015.10.010.
44. M.S. Hossain *et al.*, Glucosinolate degradation products, isothiocyanates, nitriles, and thiocyanates, induce stomatal closure accompanied by peroxidase-mediated reactive oxygen species production in Arabidopsis thaliana. *Biosci Biotechnol Biochem.* 2013;77(5):977-83.
45. X. Jin *et al.*, Abscisic acid-responsive guard cell metabolomes of Arabidopsis wild-type and gpa1 G-protein mutants. *Plant Cell.* 2013 Dec;25(12):4789-811

## Acknowledgements

We thank Jiyoung Park, Po-Kai Hsu and Julian Schroeder for *abil-1* and *ghr1* seeds and for help with stomatal aperture measurement, Eric Schmelz for assistance with freeze drying of samples, Jeongim Kim and Clint Chapple for *cyp83a1* seeds, Venkatesan Sundaresan and Titima Tantikanjana for *cyp79f* single and double mutant lines, and Jim Whelan for *wrky63-1* and *35S::WRKY63* seeds. **Funding** This work

was supported by grants from the NIH (GM43644 to ME; JRE), the Howard Hughes Medical Institute (ME and JRE), the NSF (IOS [1547796](#) and [1339125](#) to DJK) the USDA National Institute of Food and Agriculture, (Hatch project number CA-D-PLS-7033-H to DJK) and by the Danish National Research Foundation (DNRF99) grant. **Contributions.** MS and ME conceived of the project. MS prepared samples. MT analyzed RNAseq data. BL and EK performed glucosinolate assays. MS generated transgenic lines, performed genetic experiments, and performed physiological experiments. DJK assisted with glucosinolate analysis. MS and ME wrote the manuscript. MS, ME, LS, JRE, EK, and DJK edited the manuscript. JRE and LS provided materials. **Competing interests.** The authors declare no competing interests. **Data and materials availability.** Plant lines will be available through the Arabidopsis Stock Center. RNAseq data will be deposited into NCBI as GEO#xxxxx.

## Supplementary Materials:

Materials and Methods

Tables S1-S3

Figures S1-S4

References 25-45

## Figure Legends

**Figure 1. The *iaa5,6,19* mutant has lower aliphatic glucosinolate levels after dehydration stress.** (A) Aliphatic glucosinolate biosynthetic pathway. The genes listed to the right are all down-regulated in the triple mutant compared to the wild type after dehydration. (B) Heat map showing that aliphatic glucosinolate biosynthetic genes are down regulated in the *iaa5,6,19* mutant during desiccation stress. (C) Time course measurement of 4-MSO levels in 7-day-old seedlings of indicated genotypes at time intervals after application of dehydration stress. Results are presented as the means  $\pm$  SE of one experiment with 6 biological replicates consisting of n=20 pooled seedlings in each. Two independent experiments showed similar trend. Statistical significance was determined by (Student's t –test). P=0.008 and 0.013 respectively for *iaa5619* at 60 and 180 minutes of desiccation.

**Figure 2. Aliphatic glucosinolate deficiency is linked to decreased drought tolerance.** (A) *cyp79f1*, *cyp79f2* single mutant and *cyp79f1f2* double mutants are less drought tolerant compared to the wild type. (B) Quantification of rosette dry weight from (A). (C) *myb28,29* double mutants are less drought tolerant compared to the wild type. (D) *35S:MYB28*, *35S:MYB29* and *35S:AOP2* plants display increase drought tolerance (E) Overexpression of *MYB28* or *MYB29* restores drought tolerance to *iaa19-1* plants. Results are presented as the means  $\pm$  SE of one experiments with n=10 independent pots. Each experiment was



repeated at least twice. For panels A, C, D, and E, differences between mutants and Col-0 are significant at  $p < 0.05$  (\*) and  $p < 0.01$  (\*\*) by two-tailed Student's t test.

**Figure 3. Drought activates a transcriptional cascade to regulate GLS biosynthetic genes. (A)**

Relative *WRKY63* RNA level in the *iaa5,6,19* mutants compared to wild-type seedlings before and after desiccation for one hour. (B) IAA19 binds to a tandem repeat of *AuxRE* elements in the promoter of *WRKY63* (-350 to -361). ChIP was from the *rAA19-YPet-His-FLAG* line. Results are presented as the means  $\pm$  SE of 3 independent biological experiments with 3 technical replicates in each. Statistical significance was determined by two-tailed Student's t test. \*\* $P < 0.05$ . (C) Relative *MYB28* and *MYB29* RNA level in the seedlings of *35S:WRKY63* lines. (D) *35S:WRKY63* lines are less tolerant to drought than wild-type plants after water withholding in pots. Results are presented as the means  $\pm$  SE of one independent experiments with  $n=10$  independent pots/plants. Differences are significant at  $p < 0.05$  (\*) and  $p < 0.01$  (\*\*) by two-tailed Student's t test.

**Figure 4. Defects in stomatal regulation are responsible for decreased drought tolerance in glucosinolate deficient mutants. (A)**

Stomatal response to drought in Col-0, *iaa5,6,19* and *mybn28,29* lines. (B) Stomatal response to application of ABA and 4-MSO in Col-0, *iaa5,6,19* and *myb28,29* (C) 4-MSO inhibits light-induced opening of stomata from dark-adapted plants while the indolic GLS I3M is ineffective. (D) Recovery of *iaa5,6,19* mutants to topical application of 4-MSO during drought stress. Results are presented as the means  $\pm$  SE of one experiments with  $n=10$  independent pots. Two independent experiments produced similar results. (E) Stomatal response to I3M in light-grown plants. (F) Response of the *abil-1* mutant to the aliphatic GLS sinigrin hydrate. (F) Unlike Col-0 or *abil-1*, *ghr1* does not respond to 50  $\mu$ M SH. (G). Response of the *ghr1* mutant to 4-MSO, with *abil-1* as a control. (H) 4-MSO levels in *tir1/afb* mutants after 60 min desiccation treatment. (I) The *tir1/afb* mutants display increased tolerance to water withholding in pots.

For stomatal closure experiments,  $n = 250-300$  stomata from 6 different leaves from 3 different plants grown in the same chamber and growth conditions. Results are presented as the means  $\pm$  SE. Differences are significant at  $p < 0.05$  (\*) and  $p < 0.01$  (\*\*) by two-tailed Student's t test.

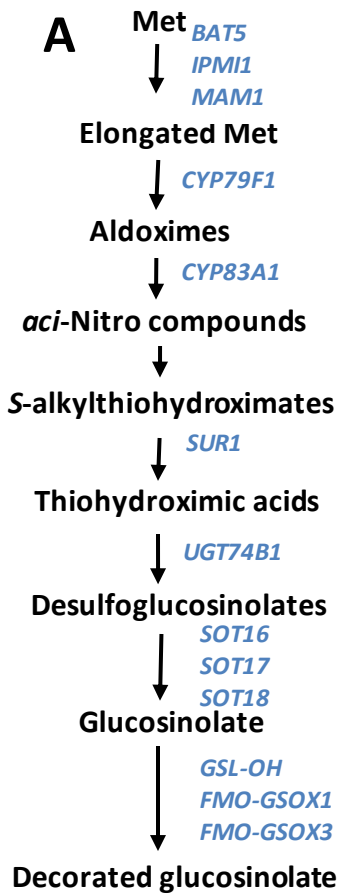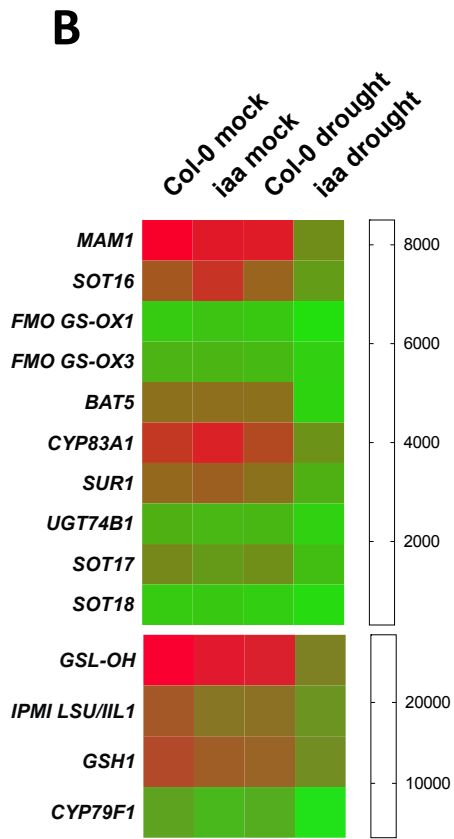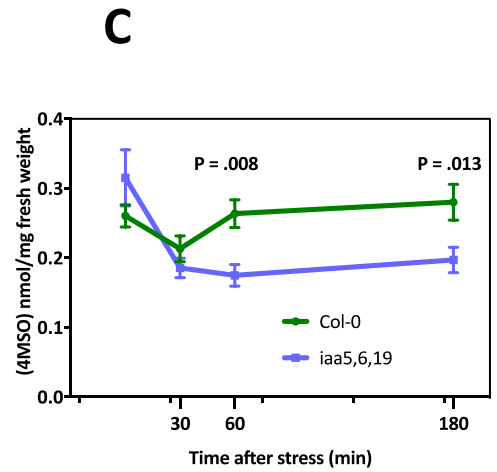

**A**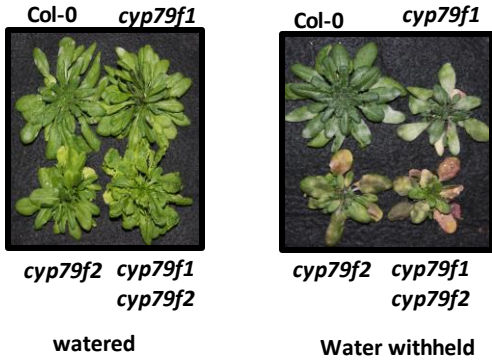**B**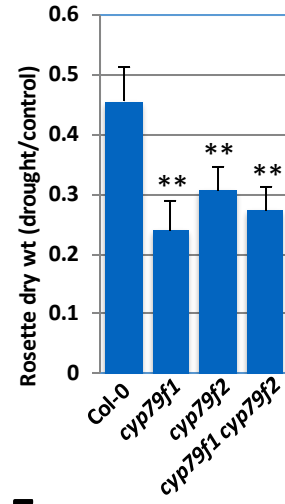**C**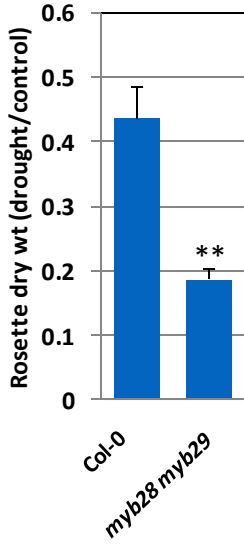**D**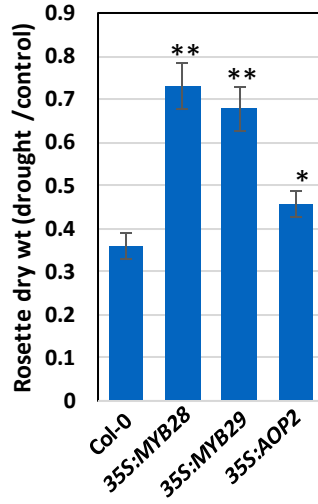**E**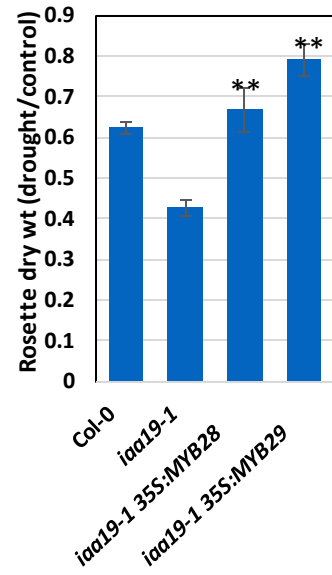

**A**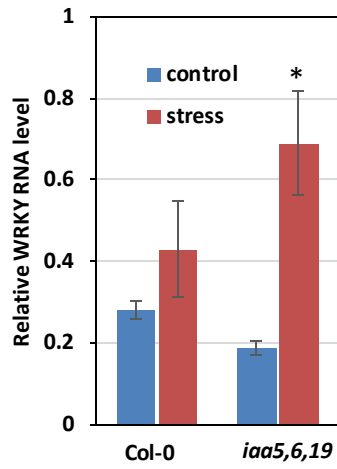**B**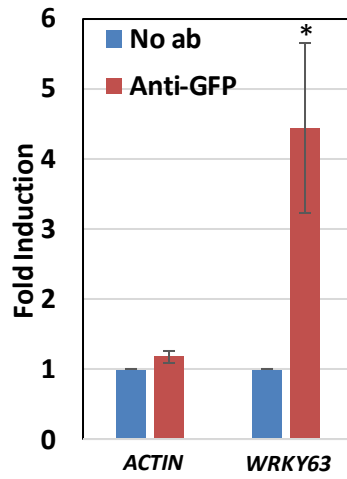**C**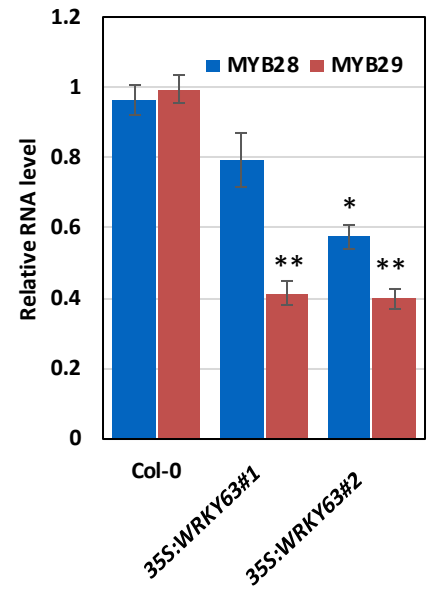**D**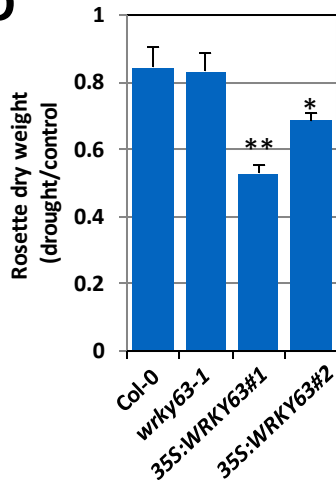

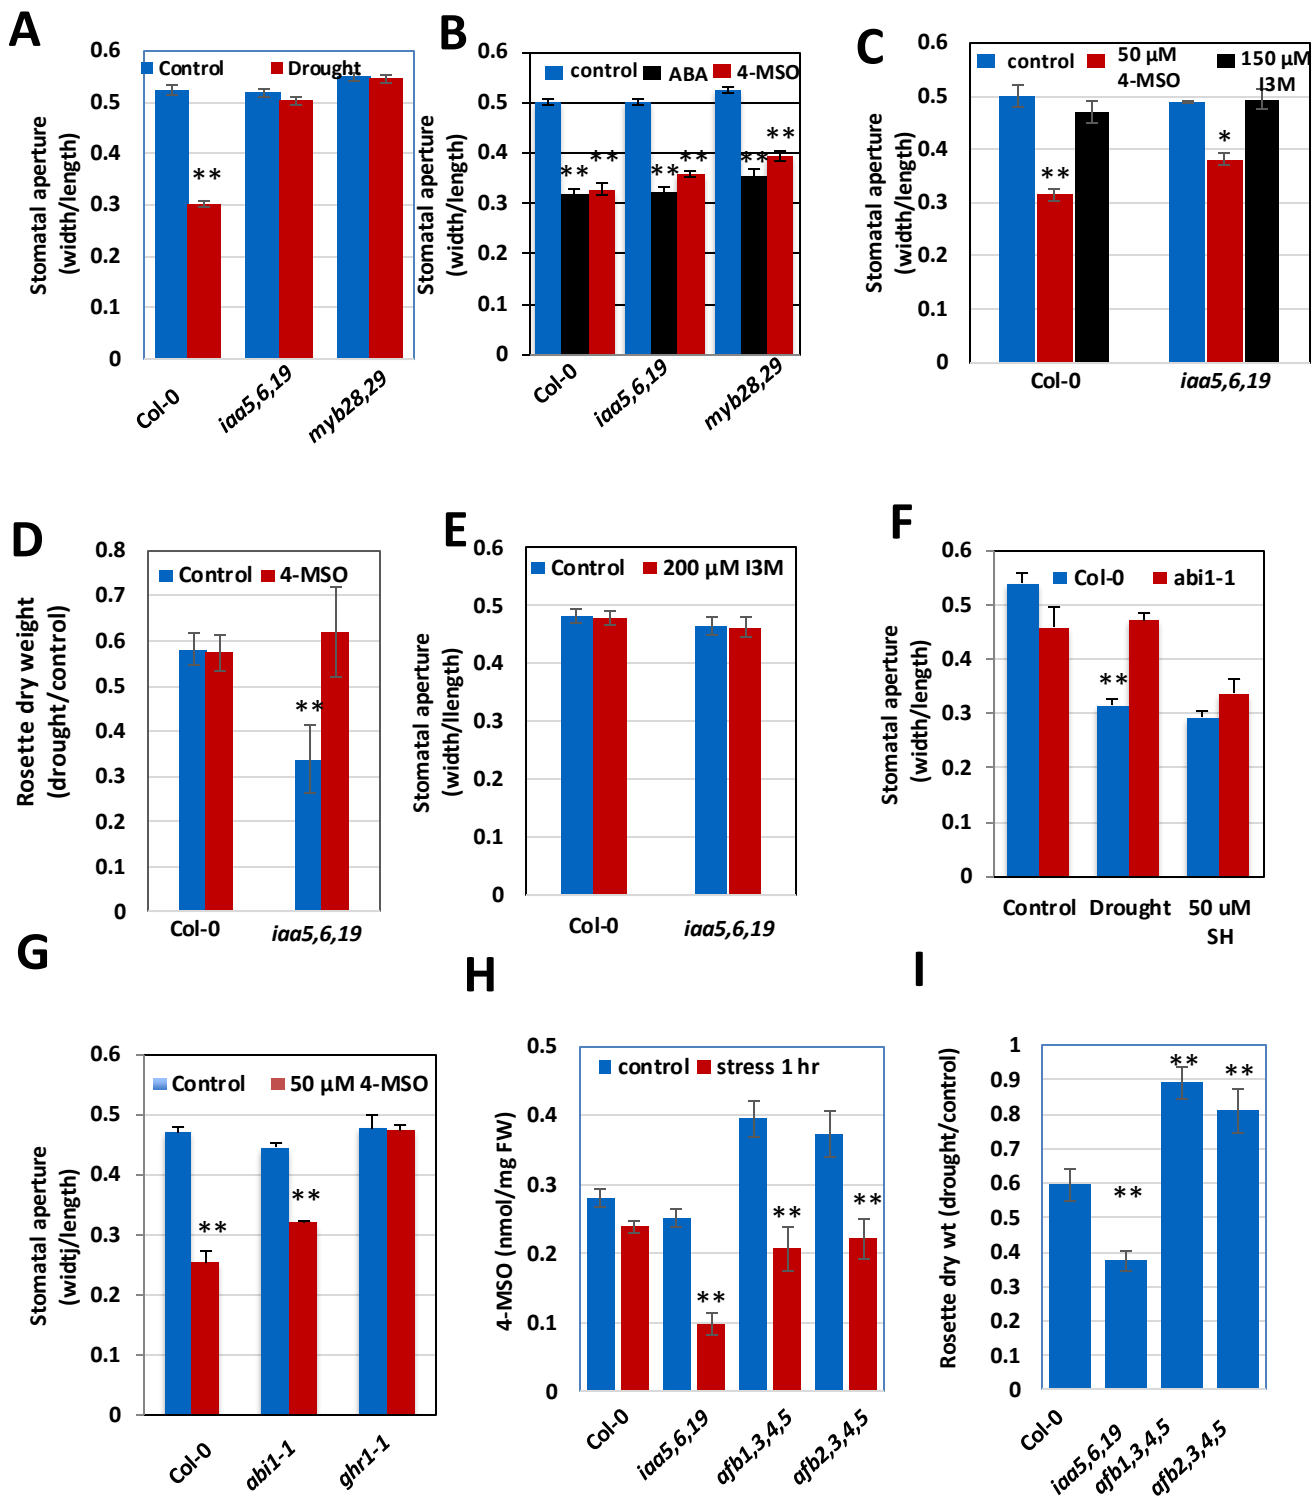

## Materials and Methods

### Plant Materials and Growth Conditions

*Arabidopsis thaliana* seed were sterilized with chlorine fumes generated by mixing 49 ml bleach and 1 ml hydrochloric acid. Sterilized seeds were sown on ½ strength MS media, stratified at 4°C for 2-3 days, and grown in long day conditions (16 h light: 8 h dark) at 22 °C with a light intensity of ~110-130  $\mu\text{mol m}^{-2} \text{sec}^{-1}$ . In addition to wild type Col-0 and Ws lines, the following mutant lines were used as described: *iaa19-1* and *iaa5 iaa6 iaa19*, *dreb2a dreb2b(3)*; *cyp79f1 cyp79f2 (3)*; *myb28 myb29*, *35S:MYB28*, *35S:MYB29 (26)*; *35S:WRKY63 OE (27)*. *abi1-1(28)*. *ghr1(29)*.

### Plasmid Construction

rIAA19-YPet-His-Flag was constructed by recombineering a 1xYPet-6xHis-3xFlag tag to the C-terminus of the IAA19 gene in the Arabidopsis TAC clone JAAtY59D10. The cloning procedure and the tag sequence have been previously described (3, 30)

### Transgenic Plants

After floral dip of wild-type Col-0 plants (31), single-insertional transgenic lines of rIAA19-YPet-His-Flag were selected by chi-square test from T2 plants on 1x Linsmaier & Skoog (Caisson Labs, UT) plates containing 15 mg/ml glufosinate ammonium. The expression of the tagged TFs was confirmed by Western blotting. Homozygous transgenic lines were selected from the subsequent generation for bulking seeds.

### RNAseq

Col-0 and *iaa5,6,19* seedlings were grown on ½ MS for 7 days and desiccated for 1 h on parafilm at room temperature. Total RNA was extracted from three independent biological replicates of each genotype using RNeasy Plant Mini Kits (Cat#79254, Qiagen, CA) and genomic DNA contamination was removed by digestion with Turbo DNase (Cat# AM1907, BioRad, CA) and/or RNase-Free DNase (Cat#79254, Qiagen). RNA quantity was checked by Bioanalyzer for quality control. Library construction and sequencing were performed at the IGM genomics center at UCSD. About 40 million reads were obtained for each sample. Raw reads were processed at Bioinformatics core facility, UCSD School of Medicine using Array Studio software. Alignments were performed using OSA4 and differential expression determined using DESeq2 (32). Gene ontology analysis was performed using Panther (33-35). Raw reads were submitted into NCBI as GEO#xxxxxx.

### ChIP qPCR

For ChIP qPCR Col-0, *reclAA19: YPet-His-FLAG* and *gWRKY63: WRKY63: eYFP* plants were grown on ½ MS for 7 days in the dark. Approximately 1g tissues were collected and crosslinked with Pierce™ Methanol-free 16% Formaldehyde (w/v) (Cat#28906, Thermo Fischer Scientific, Carlsbad, CA) diluted to 1%, for 20 minutes and quenched with 2M glycine for 5 minutes. Samples were flash frozen and ground in liquid nitrogen. Chromatin was prepared using EpiQuik

Plant ChIP Kit (Cat# P-2014-48, NY, USA) as per manufacturer's instructions. Chromatin was sheared at 4°C by 16 cycles of 30sec on and 90sec off on high settings using Bioruptor Plus sonicator device (Cat# B01020002, Diagenode, US). IP was done with anti-GFP antibody (Cat#A111222, Thermo Fischer, Carlsbad) at 4°C overnight. Purified DNA was used for qRT-PCR using SYBR green dye in a CFX96 Real-Time System (Bio-Rad, Hercules, CA).

### **RT qPCR**

Total RNA was extracted using RNA RNeasy Plant Mini Kits (Cat#79254, Qiagen) and genomic DNA contamination was removed by digestion with Turbo DNase (Cat# AM1907, BioRad, CA) and/or RNase-Free DNase (Cat#79254, Quiagen). cDNA was synthesized using SuperScript III (Cat# 18080085, Life Technologies/Thermo Fischer, Carlsbad) and analyzed by quantitative PCR using PowerUp™ SYBR® Green Master Mix (Cat#A25742, Thermo Fischer Scientific, Carlsbad, CA) on a CFX96 Real-Time System (Biorad, Hercules, CA). RNA levels were normalized against PP2A gene. Fold induction was calculated by ddCt method (36) and RNA levels as previously described (37). The oligos used for PCR are listed in Supplementary Table 3.

### **Glucosinolate Profiling**

Blind experiments were conducted with 3 different genotypes as described above. For each assay 2 independent experiments with 6 independent biological replicates grown under same condition were used. Typically, 20-30mg (fresh weight) of pooled 7 day-post-germination seedlings (n=15-20) were sampled, freeze dried and sent to UC Davis at room temperature for GLS quantification. 400 µl 90% (v/v) methanol was added to each sample tube and stored at -20°C before extraction. The tissues were disrupted with two 2.3 mm metal ball bearings in a paint shaker at room temperature and incubated at room temperature for 1 hour. Tissues were pelleted by centrifugation for 15 minutes at 2500 g and the supernatant was used for anion exchange chromatography in 96-well filter plates. After methanol and water washing steps, the columns were incubated with sulfatase solution overnight. Desulfo-GLS were eluted and analyzed by HPLC according to a previously described method (38).

### **Drought Stress Assays**

Osmotic stress assays were performed as described in (3). Briefly 35 ml ½ MS media with 1% sucrose and 0.8% Bactoagar was autoclaved and solidified in 120 mm square plates and perfused overnight with 50 ml 30% filter sterilized PEG-8000 solution. PEG was drained the next day. 5-6 day-post-germination seedlings were transferred to either ½-MS or ½-MS+PEG plates and incubated at 22 °C in long days. Root length and plant fresh weight were measured after 8 to 10 days.

Drought stress assays in soil were performed as described in done as described (39,40) with minor modifications. 7 to 10-day-old seedlings were planted in sectors (two plants per sector) of 8 cm × 8 cm × 10 cm (L × W × H) plastic pots. Plants were grown in a short-day chamber (8h/16 hr. light/dark) at 21 °C during day 18 °C during night with light intensity of 110–130 µmol m<sup>-2</sup>

$2 \text{ sec}^{-1}$ . Seedlings were fertilized regularly. After 18-20 days, pots were saturated with water, drained and weighed. Subsequently, water was withheld for 18-22 days to reduce weight up to 50% and each pot was re-watered to 75% level by injecting 40-50 ml of water in the middle of the pot with a 22-gauge needle. Pots were then subjected to re-drought for 12-15 days to reduce pot weight to 50-60%. Fresh weight and dry-weights of each rosette were measured. For dry weight rosettes were dried overnight at  $65^{\circ}\text{C}$  in a hot air oven.

In the experiments to determine the effects of GLS on drought tolerance, plants were treated as above except that water withholding began after two weeks of watering. At the same time, plants were sprayed with 50  $\mu\text{M}$  4-MSO, 50  $\mu\text{M}$  sinigrin hydrate or water 6 times during the first over the next 10 to 12 days.

### **Stomata Aperture Measurement**

Stomatal aperture experiments were performed using fully expanded young leaves from wild-type and mutant plants grown for 3-4 weeks in a growth room with 8 h of light/16 h of dark. To determine the effects of GLSs and drought on stomatal closure, control plants and plants that were subjected to water withdrawal for 3-4 days were placed in the light overnight to open the stomata. Leaves were then incubated in closing solution (5 mM MES-KOH [pH 6.15], 20mM KCl, and 1mM  $\text{CaCl}_2$ ) under light (110-130  $\text{mmol/m}^2/\text{s}$ ) for 2.5 h followed by a further 2.5 h in the presence of 50  $\mu\text{M}$  4-MSO (Glucoraphanin, Cat# 0009445, Cayman Chemicals), 200  $\mu\text{M}$  I3M (Cat# 2503S, Alkemist Labs), or 20  $\mu\text{M}$  ABA. Abaxial leaf epidermal peels were fixed on glass slide with coverslips as described previously (41,42) using Hollister Medical Adhesive Spray. Stomatal apertures were measured with a light microscope (Nikon, Japan). The epidermal peels were examined under a 40x objective using the microscope. After image acquisition, widths and lengths of stomatal apertures were measured using the ImageJ software (NIH, Bethesda, US). Six independent biological replicates (40-50 stomata from one seedling per replicate) were used for one experiment and at least three independent plants were used.

To determine the effects of GLS on stomatal opening, leaves were incubated in opening solution (10 mM MES-KOH [pH 6.15], 10mM KCl, and 10 mM iminodiacetic acid) in the dark for 2.5 h with their adaxial surface upward. Upon transfer to the light, 50 $\mu\text{M}$  4-MSO, 50 $\mu\text{M}$  sinigrin hydrate (Cat# S1647, Sigma-Aldrich) 200  $\mu\text{M}$  I3M or 20  $\mu\text{M}$  ABA were added to the solution. Stomatal aperture was measured as above.

### **Statistical Analysis**

GraphPad Prism 5.0 (San Diego, CA) and Microsoft Excel 2008 were utilized for preparing graphs and statistical analysis. ANOVA utilized for GLS analysis. For others two tailed t-tests were employed.



**Table S1. Genes differentially regulated in *iaa5,5,19* vs Col-0**

**Down-regulated genes *iaa5,6,19* vs Col-0 during stress (FDR < 0.001)**

| GeneID    | Genotype => | Genotype => | Genotype => | <i>iaa5</i> | Genotype => | <i>iaa561</i> | GeneName  |
|-----------|-------------|-------------|-------------|-------------|-------------|---------------|-----------|
| AT1G53480 | -4.194      | -18.3032    | 1.60E-143   |             | 4.22E-139   |               | MRD1      |
| AT1G54110 | -2.1168     | -4.3374     | 3.04E-38    |             | 4.01E-34    |               | AT1G54110 |
| AT3G30180 | -1.2249     | -2.3374     | 3.55E-25    |             | 3.12E-21    |               | CYP85A2   |
| AT3G15540 | -1.815      | -3.5187     | 9.65E-25    |             | 6.36E-21    |               | IAA19     |
| AT5G23010 | -1.0287     | -2.0403     | 1.11E-23    |             | 4.90E-20    |               | MAM1      |
| AT1G19200 | -1.5696     | -2.9683     | 1.63E-20    |             | 5.38E-17    |               | AT1G19200 |
| AT5G53048 | -1.5212     | -2.8702     | 2.85E-20    |             | 8.35E-17    |               | AT5G53048 |
| AT3G52840 | -0.9455     | -1.9259     | 6.26E-19    |             | 1.65E-15    |               | BGAL2     |
| AT4G35770 | -1.2253     | -2.338      | 1.04E-18    |             | 2.49E-15    |               | STR15     |
| AT4G04223 | -1.5615     | -2.9517     | 1.85E-18    |             | 4.08E-15    |               | AT4G04223 |
| AT3G17790 | -1.345      | -2.5404     | 7.50E-18    |             | 1.52E-14    |               | PAP17     |
| AT3G56040 | -0.9606     | -1.9461     | 2.84E-17    |             | 5.36E-14    |               | UGP3      |
| AT1G52190 | -1.0205     | -2.0286     | 5.32E-17    |             | 9.36E-14    |               | NPF1.2    |
| AT4G31500 | -1.2267     | -2.3403     | 7.42E-17    |             | 1.22E-13    |               | CYP83B1   |
| AT2G05540 | -1.2492     | -2.3771     | 1.25E-16    |             | 1.94E-13    |               | AT2G05540 |
| AT5G20150 | -1.0159     | -2.0221     | 1.72E-16    |             | 2.52E-13    |               | SPX1      |
| AT5G01220 | -1.1999     | -2.2972     | 3.38E-15    |             | 4.24E-12    |               | SQD2      |
| AT5G20790 | -1.4151     | -2.6667     | 3.96E-15    |             | 4.54E-12    |               | AT5G20790 |
| AT4G14040 | -0.7694     | -1.7045     | 7.35E-15    |             | 7.71E-12    |               | SBP2      |
| AT1G70890 | -0.7759     | -1.7122     | 7.12E-15    |             | 7.71E-12    |               | MLP43     |
| AT3G02020 | -1.0689     | -2.0978     | 9.76E-15    |             | 9.54E-12    |               | AK3       |
| AT1G68670 | -0.855      | -1.8088     | 1.29E-14    |             | 1.18E-11    |               | AT1G68670 |
| AT4G30270 | -0.9145     | -1.8849     | 1.26E-14    |             | 1.18E-11    |               | XTH24     |
| AT1G49500 | -1.1023     | -2.1469     | 1.38E-14    |             | 1.21E-11    |               | AT1G49500 |
| AT3G21250 | -0.7278     | -1.6562     | 1.77E-14    |             | 1.42E-11    |               | ABCC8     |
| AT3G01970 | -1.1369     | -2.199      | 2.24E-14    |             | 1.69E-11    |               | WRKY45    |
| AT5G20410 | -1.2793     | -2.4272     | 2.24E-14    |             | 1.69E-11    |               | MGD2      |
| AT3G03470 | -1.1735     | -2.2555     | 2.91E-14    |             | 2.07E-11    |               | CYP89A9   |
| AT3G57520 | -0.9571     | -1.9414     | 3.34E-14    |             | 2.32E-11    |               | RFS2      |
| AT4G03060 | -1.3704     | -2.5855     | 3.47E-14    |             | 2.34E-11    |               | AOP2      |
| AT2G27190 | -0.7821     | -1.7196     | 4.57E-14    |             | 3.01E-11    |               | PAP12     |
| AT5G63160 | -0.9391     | -1.9174     | 6.23E-14    |             | 3.82E-11    |               | BT1       |
| AT4G37800 | -0.9326     | -1.9087     | 8.90E-14    |             | 5.22E-11    |               | XTH7      |
| AT3G23050 | -0.7574     | -1.6904     | 9.52E-14    |             | 5.34E-11    |               | IAA7      |
| AT4G39940 | -1.12       | -2.1735     | 1.27E-13    |             | 6.97E-11    |               | APK2      |
| AT4G23680 | -1.217      | -2.3246     | 1.38E-13    |             | 7.45E-11    |               | AT4G23680 |
| AT2G20670 | -1.3349     | -2.5226     | 1.52E-13    |             | 8.03E-11    |               | AT2G20670 |
| AT2G20610 | -0.9792     | -1.9714     | 1.61E-13    |             | 8.34E-11    |               | SUR1      |
| AT4G16690 | -0.9465     | -1.9272     | 1.94E-13    |             | 9.67E-11    |               | PPD       |
| AT2G25450 | -0.7605     | -1.694      | 3.06E-13    |             | 1.50E-10    |               | GSL-OH    |
| AT3G02040 | -1.2044     | -2.3044     | 3.17E-13    |             | 1.52E-10    |               | GDPD1     |
| AT4G08290 | -0.993      | -1.9904     | 3.46E-13    |             | 1.60E-10    |               | AT4G08290 |

|           |         |         |          |          |           |
|-----------|---------|---------|----------|----------|-----------|
| AT5G19120 | -1.2055 | -2.3062 | 4.28E-13 | 1.94E-10 | AT5G19120 |
| AT4G13770 | -0.9939 | -1.9916 | 7.09E-13 | 3.08E-10 | CYP83A1   |
| AT1G75460 | -0.8302 | -1.7779 | 7.91E-13 | 3.37E-10 | AT1G75460 |
| AT1G27020 | -0.789  | -1.7279 | 9.20E-13 | 3.83E-10 | AT1G27020 |
| AT4G12030 | -0.8794 | -1.8396 | 9.70E-13 | 3.94E-10 | BASS5     |
| AT3G47420 | -1.0083 | -2.0116 | 1.21E-12 | 4.77E-10 | ATPS3     |
| AT5G63800 | -0.7207 | -1.648  | 1.96E-12 | 7.62E-10 | BGAL6     |
| AT4G33030 | -0.7124 | -1.6385 | 2.56E-12 | 9.65E-10 | SQD1      |
| AT2G36970 | -1.1165 | -2.1682 | 2.53E-12 | 9.65E-10 | UGT86A1   |
| AT4G19160 | -0.7672 | -1.702  | 2.81E-12 | 1.03E-09 | AT4G19160 |
| AT2G36800 | -0.9759 | -1.9669 | 3.90E-12 | 1.41E-09 | UGT73C5   |
| AT4G32480 | -1.1858 | -2.2749 | 5.68E-12 | 2.02E-09 | AT4G32480 |
| AT5G57780 | -1.0368 | -2.0516 | 5.78E-12 | 2.03E-09 | AT5G57780 |
| AT5G64620 | -0.9447 | -1.9247 | 7.02E-12 | 2.44E-09 | C/VIF2    |
| AT3G15630 | -0.9128 | -1.8827 | 1.56E-11 | 5.28E-09 | AT3G15630 |
| AT5G41080 | -1.155  | -2.2269 | 1.76E-11 | 5.87E-09 | GDPD2     |
| AT1G79410 | -0.6954 | -1.6194 | 2.05E-11 | 6.68E-09 | OCT5      |
| AT2G46650 | -0.8423 | -1.793  | 2.65E-11 | 8.51E-09 | CYTB5-C   |
| AT4G34950 | -0.91   | -1.8791 | 2.75E-11 | 8.73E-09 | AT4G34950 |
| AT4G04040 | -0.6083 | -1.5244 | 3.74E-11 | 1.17E-08 | PFP-BETA2 |
| AT3G15450 | -1.1233 | -2.1784 | 3.87E-11 | 1.20E-08 | AT3G15450 |
| AT3G21690 | -0.712  | -1.6381 | 4.24E-11 | 1.28E-08 | AT3G21690 |
| AT1G16390 | -1.1929 | -2.2861 | 4.42E-11 | 1.32E-08 | OCT3      |
| AT4G35750 | -0.9471 | -1.928  | 5.35E-11 | 1.58E-08 | AT4G35750 |
| AT3G14210 | -0.6163 | -1.533  | 5.73E-11 | 1.68E-08 | ESM1      |
| AT1G71030 | -1.1638 | -2.2404 | 6.49E-11 | 1.88E-08 | ATMYBL2   |
| AT2G41940 | -0.9462 | -1.9267 | 6.60E-11 | 1.89E-08 | ZFP8      |
| AT3G48310 | -0.6054 | -1.5214 | 7.64E-11 | 2.17E-08 | CYP71A22  |
| AT4G15540 | -0.8257 | -1.7724 | 1.01E-10 | 2.80E-08 | AT4G15540 |
| AT4G24230 | -0.9828 | -1.9763 | 1.00E-10 | 2.80E-08 | ACBP3     |
| AT3G58990 | -0.9893 | -1.9852 | 1.06E-10 | 2.92E-08 | IPM11     |
| AT3G44880 | -0.6791 | -1.6012 | 1.08E-10 | 2.93E-08 | PAO       |
| AT4G24350 | -0.9772 | -1.9686 | 1.21E-10 | 3.25E-08 | AT4G24350 |
| AT4G37310 | -0.6981 | -1.6224 | 1.57E-10 | 4.13E-08 | CYP81H1   |
| AT2G30520 | -0.9863 | -1.9811 | 2.28E-10 | 5.90E-08 | RPT2      |
| AT5G07100 | -0.8285 | -1.7758 | 2.43E-10 | 6.22E-08 | WRKY26    |
| AT1G54740 | -0.801  | -1.7423 | 2.59E-10 | 6.56E-08 | AT1G54740 |
| AT3G55240 | -0.9272 | -1.9015 | 2.77E-10 | 6.94E-08 | AT3G55240 |
| AT2G22330 | -0.7279 | -1.6562 | 3.49E-10 | 8.52E-08 | CYP79B3   |
| AT1G02820 | -1.0731 | -2.104  | 3.52E-10 | 8.52E-08 | AT1G02820 |
| AT3G26280 | -0.7492 | -1.6808 | 3.70E-10 | 8.87E-08 | CYP71B4   |
| AT2G05380 | -0.7736 | -1.7095 | 4.27E-10 | 1.02E-07 | GRP3S     |
| AT5G44020 | -0.8544 | -1.8081 | 4.53E-10 | 1.07E-07 | AT5G44020 |
| AT1G77760 | -0.8702 | -1.8279 | 4.71E-10 | 1.10E-07 | NIA1      |
| AT3G07350 | -1.1096 | -2.1579 | 4.76E-10 | 1.10E-07 | AT3G07350 |

|           |         |         |          |          |           |
|-----------|---------|---------|----------|----------|-----------|
| AT3G30775 | -0.9802 | -1.9727 | 5.19E-10 | 1.18E-07 | POX1      |
| AT1G17710 | -1.1248 | -2.1807 | 5.17E-10 | 1.18E-07 | AT1G17710 |
| AT1G74100 | -0.924  | -1.8973 | 5.36E-10 | 1.21E-07 | SOT16     |
| AT1G65860 | -1.115  | -2.166  | 5.98E-10 | 1.33E-07 | FMOGS-OX1 |
| AT2G14750 | -0.9656 | -1.9528 | 6.53E-10 | 1.43E-07 | APK1      |
| AT1G53490 | -0.929  | -1.904  | 7.57E-10 | 1.65E-07 | HEI10     |
| AT3G62820 | -0.6668 | -1.5876 | 8.06E-10 | 1.74E-07 | AT3G62820 |
| AT3G26510 | -1.0496 | -2.0699 | 9.56E-10 | 2.03E-07 | AT3G26510 |
| AT5G65730 | -1.0862 | -2.1231 | 1.04E-09 | 2.19E-07 | XTH6      |
| AT5G57630 | -0.6874 | -1.6104 | 1.10E-09 | 2.30E-07 | CIPK21    |
| AT1G23870 | -0.7446 | -1.6755 | 1.11E-09 | 2.30E-07 | TPS9      |
| AT3G50480 | -0.7704 | -1.7058 | 1.11E-09 | 2.30E-07 | HR4       |
| AT2G31790 | -0.7402 | -1.6704 | 1.22E-09 | 2.50E-07 | UGT74C1   |
| AT5G14780 | -0.7402 | -1.6704 | 1.23E-09 | 2.50E-07 | FDH1      |
| AT2G22990 | -0.6156 | -1.5322 | 1.32E-09 | 2.66E-07 | SCPL8     |
| AT1G27290 | -0.7169 | -1.6436 | 1.38E-09 | 2.76E-07 | AT1G27290 |
| AT1G25440 | -0.8775 | -1.8372 | 1.41E-09 | 2.80E-07 | COL16     |
| AT2G26660 | -0.7201 | -1.6473 | 1.50E-09 | 2.96E-07 | SPX2      |
| AT5G22390 | -0.7819 | -1.7194 | 1.55E-09 | 3.03E-07 | AT5G22390 |
| AT1G15260 | -0.8885 | -1.8513 | 1.78E-09 | 3.45E-07 | AT1G15260 |
| AT3G26170 | -1.035  | -2.0492 | 1.93E-09 | 3.72E-07 | CYP71B19  |
| AT2G25080 | -0.5921 | -1.5075 | 2.19E-09 | 4.18E-07 | GPX1      |
| AT2G19800 | -0.9106 | -1.8798 | 2.24E-09 | 4.26E-07 | MIOX2     |
| AT1G33811 | -0.7703 | -1.7056 | 2.33E-09 | 4.36E-07 | AT1G33811 |
| AT2G34210 | -1.0102 | -2.0143 | 2.42E-09 | 4.50E-07 | AT2G34210 |
| AT4G15530 | -0.7261 | -1.6541 | 2.48E-09 | 4.57E-07 | PPDK      |
| AT3G59930 | -1.0692 | -2.0983 | 2.70E-09 | 4.91E-07 | AT3G59930 |
| AT4G04840 | -1.0483 | -2.0681 | 2.74E-09 | 4.95E-07 | MSRB6     |
| AT3G54600 | -0.7661 | -1.7006 | 3.07E-09 | 5.51E-07 | DJ1F      |
| AT1G62380 | -0.6118 | -1.5282 | 3.11E-09 | 5.54E-07 | ACO2      |
| AT1G52100 | -0.8392 | -1.789  | 3.23E-09 | 5.72E-07 | AT1G52100 |
| AT2G46220 | -0.6212 | -1.5382 | 3.38E-09 | 5.86E-07 | AT2G46220 |
| AT5G02480 | -0.6456 | -1.5644 | 3.36E-09 | 5.86E-07 | AT5G02480 |
| AT4G38470 | -0.7815 | -1.7189 | 3.60E-09 | 6.21E-07 | AT4G38470 |
| AT1G15100 | -0.6742 | -1.5957 | 3.71E-09 | 6.36E-07 | RHA2A     |
| AT5G07460 | -0.8677 | -1.8247 | 3.79E-09 | 6.42E-07 | MRSA2     |
| AT4G37610 | -0.8947 | -1.8592 | 3.79E-09 | 6.42E-07 | BT5       |
| AT3G51600 | -0.6923 | -1.6159 | 4.01E-09 | 6.68E-07 | LTP5      |
| AT5G56550 | -1.0004 | -2.0006 | 4.02E-09 | 6.68E-07 | OXS3      |
| AT1G68740 | -0.6326 | -1.5503 | 4.36E-09 | 7.19E-07 | PHO1-H1   |
| AT4G16680 | -0.6366 | -1.5547 | 5.11E-09 | 8.32E-07 | AT4G16680 |
| AT5G15410 | -0.8769 | -1.8364 | 5.68E-09 | 8.98E-07 | CNGC2     |
| AT2G06850 | -0.659  | -1.579  | 5.82E-09 | 9.14E-07 | XTH4      |
| AT3G04110 | -0.6751 | -1.5967 | 7.05E-09 | 1.09E-06 | GLR1.1    |
| AT4G16880 | -0.898  | -1.8635 | 7.83E-09 | 1.19E-06 | AT4G16880 |

|           |         |         |          |          |           |
|-----------|---------|---------|----------|----------|-----------|
| AT1G24100 | -0.9108 | -1.88   | 8.57E-09 | 1.29E-06 | UGT74B1   |
| AT3G42658 | -1.0167 | -2.0232 | 9.20E-09 | 1.38E-06 | SADHU3-2  |
| AT4G10120 | -0.8717 | -1.8298 | 9.45E-09 | 1.40E-06 | SPS4      |
| AT5G27350 | -0.6695 | -1.5905 | 9.64E-09 | 1.42E-06 | SFP1      |
| AT4G21680 | -0.9697 | -1.9585 | 1.04E-08 | 1.53E-06 | NPF7.2    |
| AT3G28740 | -1.0071 | -2.0099 | 1.08E-08 | 1.58E-06 | CYP81D11  |
| AT5G47610 | -0.8201 | -1.7655 | 1.12E-08 | 1.61E-06 | ATL79     |
| AT4G19170 | -0.9953 | -1.9936 | 1.16E-08 | 1.65E-06 | CCD4      |
| AT1G18810 | -0.8642 | -1.8204 | 1.19E-08 | 1.69E-06 | PKS3      |
| AT1G64900 | -0.7619 | -1.6958 | 1.25E-08 | 1.77E-06 | CYP89A2   |
| AT1G17830 | -0.7329 | -1.662  | 1.35E-08 | 1.88E-06 | AT1G17830 |
| AT5G64570 | -0.9411 | -1.92   | 1.34E-08 | 1.88E-06 | BXL4      |
| AT5G53030 | -0.8971 | -1.8623 | 1.38E-08 | 1.91E-06 | AT5G53030 |
| AT1G75220 | -0.6681 | -1.589  | 1.39E-08 | 1.91E-06 | AT1G75220 |
| AT4G15760 | -0.795  | -1.735  | 1.52E-08 | 2.07E-06 | MO1       |
| AT1G78230 | -0.8072 | -1.7498 | 1.65E-08 | 2.23E-06 | AT1G78230 |
| AT1G13990 | -0.6142 | -1.5307 | 1.70E-08 | 2.28E-06 | AT1G13990 |
| AT2G02950 | -0.9039 | -1.8711 | 1.81E-08 | 2.43E-06 | PKS1      |
| AT3G16770 | -0.8264 | -1.7732 | 1.90E-08 | 2.53E-06 | RAP2-3    |
| AT2G11810 | -0.9914 | -1.9881 | 1.98E-08 | 2.62E-06 | MGD3      |
| AT3G50750 | -0.7803 | -1.7175 | 2.11E-08 | 2.77E-06 | BEH1      |
| AT1G11820 | -0.597  | -1.5125 | 2.26E-08 | 2.96E-06 | AT1G11820 |
| AT1G09240 | -1.0109 | -2.0151 | 2.33E-08 | 3.03E-06 | NAS3      |
| AT5G08370 | -0.5887 | -1.5039 | 2.36E-08 | 3.05E-06 | AGAL2     |
| AT5G23730 | -0.7403 | -1.6705 | 2.40E-08 | 3.08E-06 | RUP2      |
| AT5G54630 | -0.8518 | -1.8047 | 2.40E-08 | 3.08E-06 | AT5G54630 |
| AT2G32540 | -0.8379 | -1.7875 | 2.64E-08 | 3.33E-06 | CSLB4     |
| AT3G13110 | -0.8295 | -1.777  | 2.93E-08 | 3.63E-06 | SAT3      |
| AT3G59300 | -0.633  | -1.5508 | 2.92E-08 | 3.63E-06 | AT3G59300 |
| AT5G18630 | -0.7603 | -1.6938 | 3.04E-08 | 3.73E-06 | AT5G18630 |
| AT3G11670 | -0.7274 | -1.6557 | 3.20E-08 | 3.87E-06 | DGD1      |
| AT3G16520 | -0.6701 | -1.5912 | 3.27E-08 | 3.94E-06 | UGT88A1   |
| AT1G18590 | -0.8279 | -1.7751 | 3.33E-08 | 3.98E-06 | SOT17     |
| AT5G48490 | -0.9082 | -1.8767 | 3.38E-08 | 4.00E-06 | AT5G48490 |
| AT1G12240 | -0.8302 | -1.7779 | 3.49E-08 | 4.11E-06 | BFRUCT4   |
| AT1G68520 | -0.9292 | -1.9043 | 3.72E-08 | 4.36E-06 | COL6      |
| AT5G41761 | -0.9035 | -1.8706 | 3.88E-08 | 4.53E-06 | AT5G41761 |
| AT1G21060 | -0.7479 | -1.6794 | 3.98E-08 | 4.63E-06 | AT1G21060 |
| AT1G80440 | -0.9765 | -1.9676 | 4.08E-08 | 4.72E-06 | AT1G80440 |
| AT4G15690 | -0.8737 | -1.8324 | 4.38E-08 | 5.03E-06 | GRXS5     |
| AT5G52250 | -0.7323 | -1.6613 | 5.74E-08 | 6.47E-06 | RUP1      |
| AT1G54010 | -0.73   | -1.6586 | 6.23E-08 | 6.90E-06 | GLL23     |
| AT5G19230 | -0.7798 | -1.7169 | 6.22E-08 | 6.90E-06 | AT5G19230 |
| AT5G03120 | -0.8575 | -1.8119 | 6.54E-08 | 7.22E-06 | AT5G03120 |
| AT2G03980 | -0.7297 | -1.6583 | 6.98E-08 | 7.64E-06 | AT2G03980 |

|           |         |         |          |          |           |
|-----------|---------|---------|----------|----------|-----------|
| AT1G24148 | -0.7283 | -1.6567 | 8.03E-08 | 8.54E-06 | AT1G24148 |
| AT2G19650 | -0.6426 | -1.5611 | 8.28E-08 | 8.74E-06 | AT2G19650 |
| AT2G29420 | -0.5872 | -1.5023 | 8.27E-08 | 8.74E-06 | GSTU7     |
| AT4G34350 | -0.6441 | -1.5628 | 1.02E-07 | 1.06E-05 | ISPH      |
| AT3G15510 | -0.9214 | -1.8939 | 1.03E-07 | 1.07E-05 | ATNAC2    |
| AT1G65870 | -0.9438 | -1.9237 | 1.14E-07 | 1.18E-05 | DIR21     |
| AT1G24260 | -0.948  | -1.9292 | 1.17E-07 | 1.20E-05 | SEP3      |
| AT5G44130 | -0.853  | -1.8062 | 1.21E-07 | 1.24E-05 | FLA13     |
| AT5G49740 | -0.829  | -1.7764 | 1.23E-07 | 1.24E-05 | FRO7      |
| AT1G62560 | -0.8649 | -1.8212 | 1.33E-07 | 1.33E-05 | FMOGS-OX3 |
| AT5G05730 | -0.7419 | -1.6724 | 1.36E-07 | 1.36E-05 | ASA1      |
| AT1G68110 | -0.8292 | -1.7767 | 1.67E-07 | 1.64E-05 | AT1G68110 |
| AT5G37260 | -0.7    | -1.6245 | 1.75E-07 | 1.71E-05 | RVE2      |
| AT2G38940 | -0.7405 | -1.6707 | 1.77E-07 | 1.73E-05 | PHT1-4    |
| AT4G24040 | -0.7597 | -1.6932 | 1.81E-07 | 1.76E-05 | TRE1      |
| AT3G05630 | -0.9124 | -1.8822 | 1.94E-07 | 1.87E-05 | PLDP2     |
| AT4G12290 | -0.6189 | -1.5357 | 2.16E-07 | 2.03E-05 | AT4G12290 |
| AT2G41250 | -0.8355 | -1.7845 | 2.21E-07 | 2.07E-05 | AT2G41250 |
| AT5G63980 | -0.625  | -1.5422 | 2.45E-07 | 2.29E-05 | SAL1      |
| AT5G13770 | -0.6415 | -1.5599 | 2.47E-07 | 2.29E-05 | AT5G13770 |
| AT4G15670 | -0.8805 | -1.841  | 2.80E-07 | 2.56E-05 | GRXS7     |
| AT3G22740 | -0.9266 | -1.9008 | 2.92E-07 | 2.65E-05 | HMT3      |
| AT3G10420 | -0.7733 | -1.7091 | 3.14E-07 | 2.83E-05 | SPD1      |
| AT1G55960 | -0.8588 | -1.8136 | 3.22E-07 | 2.87E-05 | AT1G55960 |
| AT1G60140 | -0.6187 | -1.5355 | 3.28E-07 | 2.90E-05 | TPS10     |
| AT5G64572 | -0.7566 | -1.6895 | 3.31E-07 | 2.92E-05 | AT5G64572 |
| AT3G06750 | -0.5895 | -1.5047 | 3.40E-07 | 2.98E-05 | AT3G06750 |
| AT4G21470 | -0.6298 | -1.5474 | 3.46E-07 | 3.02E-05 | FHY       |
| AT2G16280 | -0.664  | -1.5845 | 4.55E-07 | 3.86E-05 | KCS9      |
| AT4G01680 | -0.7539 | -1.6864 | 4.54E-07 | 3.86E-05 | MYB55     |
| AT1G58180 | -0.6963 | -1.6204 | 4.75E-07 | 3.99E-05 | BCA6      |
| AT5G40890 | -0.7051 | -1.6303 | 5.07E-07 | 4.23E-05 | CLC-A     |
| AT3G03790 | -0.7683 | -1.7033 | 5.14E-07 | 4.25E-05 | AT3G03790 |
| AT1G24800 | -0.9033 | -1.8703 | 5.13E-07 | 4.25E-05 | AT1G24800 |
| AT1G74290 | -0.8982 | -1.8637 | 6.19E-07 | 5.06E-05 | AT1G74290 |
| AT5G18670 | -0.7378 | -1.6676 | 6.24E-07 | 5.08E-05 | BAM9      |
| AT1G74090 | -0.6919 | -1.6155 | 6.40E-07 | 5.19E-05 | SOT18     |
| AT1G23110 | -0.8803 | -1.8407 | 6.45E-07 | 5.22E-05 | AT1G23110 |
| AT4G24890 | -0.8966 | -1.8616 | 6.65E-07 | 5.37E-05 | PAP24     |
| AT4G15700 | -0.8366 | -1.7859 | 6.78E-07 | 5.43E-05 | GRXS3     |
| AT3G59940 | -0.5882 | -1.5033 | 7.73E-07 | 6.09E-05 | SKIP20    |
| AT1G16410 | -0.8647 | -1.821  | 8.29E-07 | 6.45E-05 | CYP79F1   |
| AT1G70290 | -0.6155 | -1.5321 | 8.45E-07 | 6.54E-05 | TPS8      |
| AT3G52060 | -0.6501 | -1.5693 | 8.97E-07 | 6.92E-05 | AT3G52060 |
| AT3G51860 | -0.6744 | -1.5959 | 9.37E-07 | 7.20E-05 | CAX3      |

|           |         |         |          |          |           |
|-----------|---------|---------|----------|----------|-----------|
| AT2G39920 | -0.773  | -1.7088 | 9.84E-07 | 7.54E-05 | AT2G39920 |
| AT3G59400 | -0.6651 | -1.5857 | 1.06E-06 | 8.07E-05 | GUN4      |
| AT5G16370 | -0.7736 | -1.7095 | 1.10E-06 | 8.27E-05 | AAE5      |
| AT1G25400 | -0.6975 | -1.6217 | 1.15E-06 | 8.61E-05 | AT1G25400 |
| AT1G21460 | -0.8338 | -1.7823 | 1.16E-06 | 8.62E-05 | SWEET1    |
| AT3G28540 | -0.7201 | -1.6473 | 1.22E-06 | 8.97E-05 | AT3G28540 |
| AT1G75960 | -0.7631 | -1.6971 | 1.25E-06 | 9.17E-05 | AAE8      |
| AT4G12320 | -0.6411 | -1.5596 | 1.26E-06 | 9.17E-05 | CYP706A6  |
| AT5G45430 | -0.6521 | -1.5714 | 1.25E-06 | 9.17E-05 | AT5G45430 |
| AT3G26200 | -0.8729 | -1.8314 | 1.31E-06 | 9.50E-05 | CYP71B22  |
| AT3G48740 | -0.6048 | -1.5208 | 1.64E-06 | 0.0001   | SWEET11   |
| AT3G45730 | -0.6426 | -1.5611 | 1.69E-06 | 0.0001   | AT3G45730 |
| AT1G32520 | -0.6547 | -1.5743 | 2.19E-06 | 0.0001   | AT1G32520 |
| AT4G22200 | -0.679  | -1.601  | 1.88E-06 | 0.0001   | AKT2      |
| AT4G36040 | -0.7293 | -1.6579 | 1.81E-06 | 0.0001   | ATJ11     |
| AT1G67070 | -0.746  | -1.6772 | 1.83E-06 | 0.0001   | PMI2      |
| AT2G34490 | -0.8196 | -1.765  | 1.58E-06 | 0.0001   | CYP710A2  |
| AT2G38750 | -0.851  | -1.8037 | 1.73E-06 | 0.0001   | ANN4      |
| AT1G67600 | -0.8718 | -1.83   | 1.46E-06 | 0.0001   | AT1G67600 |
| AT5G45428 | -0.6679 | -1.5887 | 2.01E-06 | 0.0001   | CPuORF24  |
| AT1G21400 | -0.6361 | -1.5541 | 3.08E-06 | 0.0002   | F24J8.4   |
| AT1G11260 | -0.6493 | -1.5684 | 3.82E-06 | 0.0002   | STP1      |
| AT3G52720 | -0.6574 | -1.5773 | 3.11E-06 | 0.0002   | ACA1      |
| AT4G38420 | -0.6853 | -1.608  | 3.54E-06 | 0.0002   | sks9      |
| AT3G23550 | -0.7098 | -1.6356 | 2.91E-06 | 0.0002   | LAL5      |
| AT5G16190 | -0.7255 | -1.6535 | 3.17E-06 | 0.0002   | CSLA11    |
| AT1G32780 | -0.7569 | -1.6899 | 3.95E-06 | 0.0002   | AT1G32780 |
| AT2G21210 | -0.8068 | -1.7493 | 4.00E-06 | 0.0002   | AT2G21210 |
| AT3G50560 | -0.807  | -1.7495 | 3.40E-06 | 0.0002   | AT3G50560 |
| AT4G26260 | -0.8354 | -1.7844 | 3.88E-06 | 0.0002   | MIOX4     |
| AT1G23390 | -0.8373 | -1.7867 | 3.23E-06 | 0.0002   | AT1G23390 |
| AT4G19380 | -0.8424 | -1.793  | 2.93E-06 | 0.0002   | FAO4A     |
| AT4G02050 | -0.7272 | -1.6554 | 2.48E-06 | 0.0002   | STP7      |
| AT5G41050 | -0.6098 | -1.5261 | 4.13E-06 | 0.0003   | AT5G41050 |
| AT4G03960 | -0.633  | -1.5508 | 6.08E-06 | 0.0003   | AT4G03960 |
| AT4G21070 | -0.6333 | -1.5511 | 5.52E-06 | 0.0003   | BRCA1     |
| AT4G12390 | -0.6455 | -1.5643 | 4.15E-06 | 0.0003   | PME1      |
| AT1G01430 | -0.6934 | -1.617  | 4.11E-06 | 0.0003   | TBL25     |
| AT1G28670 | -0.7221 | -1.6495 | 5.02E-06 | 0.0003   | ARAB-1    |
| AT4G26850 | -0.7741 | -1.7101 | 4.57E-06 | 0.0003   | VTC2      |
| AT2G45130 | -0.7834 | -1.7211 | 5.65E-06 | 0.0003   | SPX3      |
| AT5G61440 | -0.7997 | -1.7408 | 5.53E-06 | 0.0003   | ACHT5     |
| AT3G48360 | -0.8014 | -1.7428 | 4.88E-06 | 0.0003   | BT2       |
| AT3G09450 | -0.8279 | -1.7752 | 4.32E-06 | 0.0003   | AT3G09450 |
| AT4G14680 | -0.6246 | -1.5418 | 7.06E-06 | 0.0004   | APS3      |

|           |         |         |          |        |            |
|-----------|---------|---------|----------|--------|------------|
| AT1G13260 | -0.6451 | -1.5638 | 7.13E-06 | 0.0004 | RAV1       |
| AT4G15430 | -0.6466 | -1.5655 | 6.74E-06 | 0.0004 | AT4G15430  |
| AT4G38690 | -0.6529 | -1.5723 | 8.26E-06 | 0.0004 | AT4G38690  |
| AT3G14770 | -0.6542 | -1.5737 | 6.42E-06 | 0.0004 | SWEET2     |
| AT5G07690 | -0.7109 | -1.6368 | 7.74E-06 | 0.0004 | MYB29      |
| AT3G04070 | -0.7602 | -1.6938 | 7.08E-06 | 0.0004 | anac047    |
| AT5G17030 | -0.8051 | -1.7472 | 7.04E-06 | 0.0004 | UGT78D3    |
| AT1G79770 | -0.8053 | -1.7475 | 7.36E-06 | 0.0004 | AT1G79770  |
| AT2G41120 | -0.5902 | -1.5055 | 8.31E-06 | 0.0004 | AT2G41120  |
| AT1G80920 | -0.6497 | -1.5688 | 7.25E-06 | 0.0004 | ATJ8       |
| AT5G56860 | -0.586  | -1.5011 | 8.65E-06 | 0.0005 | GATA21     |
| AT1G24580 | -0.6263 | -1.5436 | 9.71E-06 | 0.0005 | AT1G24580  |
| AT5G67420 | -0.6418 | -1.5603 | 1.02E-05 | 0.0005 | LBD37      |
| AT2G32530 | -0.679  | -1.601  | 1.04E-05 | 0.0005 | CSLB3      |
| AT4G36670 | -0.6911 | -1.6146 | 8.70E-06 | 0.0005 | PLT6       |
| AT1G14280 | -0.7212 | -1.6486 | 9.45E-06 | 0.0005 | PKS2       |
| AT1G53870 | -0.7769 | -1.7135 | 1.07E-05 | 0.0005 | AT1G53870  |
| AT5G50790 | -0.7839 | -1.7218 | 1.04E-05 | 0.0005 | SWEET10    |
| AT5G35525 | -0.793  | -1.7327 | 1.06E-05 | 0.0005 | PCR3       |
| AT4G03510 | -0.6691 | -1.59   | 9.79E-06 | 0.0005 | RMA1       |
| AT1G75100 | -0.5914 | -1.5067 | 1.34E-05 | 0.0006 | JAC1       |
| AT2G23840 | -0.609  | -1.5252 | 1.17E-05 | 0.0006 | AT2G23840  |
| AT5G48485 | -0.6289 | -1.5464 | 1.27E-05 | 0.0006 | DIR1       |
| AT1G01180 | -0.6603 | -1.5805 | 1.20E-05 | 0.0006 | AT1G01180  |
| AT4G15680 | -0.6805 | -1.6027 | 1.20E-05 | 0.0006 | GRXS4      |
| AT4G17245 | -0.707  | -1.6323 | 1.28E-05 | 0.0006 | AT4G17245  |
| AT4G12470 | -0.7417 | -1.6722 | 1.17E-05 | 0.0006 | AZI1       |
| AT1G43800 | -0.7482 | -1.6796 | 1.27E-05 | 0.0006 | S-ACP-DES6 |
| AT2G22770 | -0.749  | -1.6806 | 1.29E-05 | 0.0006 | NAI1       |
| AT1G72890 | -0.7493 | -1.681  | 1.19E-05 | 0.0006 | AT1G72890  |
| AT2G17880 | -0.7781 | -1.7148 | 1.29E-05 | 0.0006 | AT2G17880  |
| AT1G49200 | -0.7898 | -1.7288 | 1.18E-05 | 0.0006 | ATL75      |
| AT3G50840 | -0.6716 | -1.5929 | 1.26E-05 | 0.0006 | AT3G50840  |
| AT2G30600 | -0.6877 | -1.6107 | 1.23E-05 | 0.0006 | AT2G30600  |
| AT1G22500 | -0.7031 | -1.628  | 1.22E-05 | 0.0006 | ATL15      |
| AT5G23350 | -0.7623 | -1.6962 | 1.26E-05 | 0.0006 | AT5G23350  |
| AT2G16380 | -0.5878 | -1.5029 | 1.40E-05 | 0.0007 | SFH7       |
| AT3G47750 | -0.597  | -1.5126 | 1.41E-05 | 0.0007 | ATATH3     |
| AT2G46450 | -0.626  | -1.5433 | 1.47E-05 | 0.0007 | CNGC12     |
| AT2G15890 | -0.683  | -1.6054 | 1.55E-05 | 0.0007 | MEE14      |
| AT3G23410 | -0.5942 | -1.5096 | 1.72E-05 | 0.0008 | FAO3       |
| AT1G68440 | -0.6286 | -1.5461 | 1.87E-05 | 0.0008 | AT1G68440  |
| AT1G03440 | -0.6591 | -1.5791 | 1.69E-05 | 0.0008 | AT1G03440  |
| AT1G69370 | -0.6939 | -1.6176 | 1.67E-05 | 0.0008 | CM3        |
| AT3G61060 | -0.7499 | -1.6817 | 1.78E-05 | 0.0008 | PP2A13     |

|           |         |         |          |        |           |
|-----------|---------|---------|----------|--------|-----------|
| AT1G13100 | -0.6183 | -1.5351 | 2.00E-05 | 0.0009 | CYP71B29  |
| AT1G62290 | -0.6506 | -1.5698 | 2.06E-05 | 0.0009 | APA2      |
| AT1G15580 | -0.7049 | -1.63   | 2.07E-05 | 0.0009 | IAA5      |
| AT5G38780 | -0.71   | -1.6359 | 2.00E-05 | 0.0009 | AT5G38780 |
| AT1G08310 | -0.7554 | -1.6881 | 2.05E-05 | 0.0009 | AT1G08310 |
| AT3G10150 | -0.7603 | -1.6939 | 2.03E-05 | 0.0009 | PAP16     |
| AT5G17860 | -0.6125 | -1.5289 | 2.42E-05 | 0.001  | CCX1      |
| AT3G21010 | -0.758  | -1.6912 | 2.46E-05 | 0.001  | AT3G21010 |
| AT4G38860 | -0.7626 | -1.6966 | 2.40E-05 | 0.001  | AT4G38860 |

### Up-regulated genes *iaa5,6,19* vs Col-0 during stress (FDR < 0.001)

| GeneID    | Genotype => | Genotype => | Genotype => <i>iaa5</i> | Genotype => <i>iaa561</i> | GeneName  |
|-----------|-------------|-------------|-------------------------|---------------------------|-----------|
| AT4G08093 | 1.7298      | 3.3168      | 2.91E-24                | 1.53E-20                  | AT4G08093 |
| AT4G31940 | 1.7008      | 3.2508      | 2.13E-21                | 8.01E-18                  | CYP82C4   |
| AT3G03341 | 1.2225      | 2.3335      | 6.35E-16                | 8.82E-13                  | AT3G03341 |
| AT1G11080 | 1.0681      | 2.0967      | 2.00E-15                | 2.63E-12                  | SCPL31    |
| AT3G62270 | 0.803       | 1.7447      | 3.91E-15                | 4.54E-12                  | BOR2      |
| AT1G07430 | 1.0524      | 2.074       | 1.57E-14                | 1.30E-11                  | AIP1      |
| AT5G56080 | 1.3521      | 2.5528      | 2.76E-14                | 2.02E-11                  | NAS2      |
| AT2G28780 | 1.0299      | 2.0418      | 4.69E-14                | 3.02E-11                  | AT2G28780 |
| AT1G20030 | 0.9097      | 1.8787      | 4.87E-14                | 3.06E-11                  | AT1G20030 |
| AT2G39800 | 0.9305      | 1.9059      | 8.32E-14                | 4.99E-11                  | P5CSA     |
| AT1G01580 | 1.3174      | 2.4922      | 9.26E-14                | 5.31E-11                  | FRO2      |
| AT3G02550 | 1.1501      | 2.2193      | 1.85E-13                | 9.41E-11                  | LBD41     |
| AT3G27150 | 1.1158      | 2.1671      | 3.41E-13                | 1.60E-10                  | AT3G27150 |
| AT1G30510 | 0.7679      | 1.7028      | 5.31E-13                | 2.37E-10                  | RFNR2     |
| AT1G49860 | 1.0054      | 2.0075      | 1.06E-12                | 4.22E-10                  | GSTF14    |
| AT3G12900 | 1.2446      | 2.3696      | 2.75E-12                | 1.02E-09                  | AT3G12900 |
| AT5G02780 | 1.1309      | 2.1899      | 1.40E-11                | 4.79E-09                  | GSTL1     |
| AT1G69880 | 1.0113      | 2.0157      | 1.79E-11                | 5.90E-09                  | TRX8      |
| AT3G43190 | 0.915       | 1.8856      | 4.09E-11                | 1.26E-08                  | SUS4      |
| AT3G13784 | 1.0575      | 2.0813      | 1.39E-10                | 3.71E-08                  | AtcwINV5  |
| AT2G39510 | 0.8018      | 1.7432      | 2.11E-10                | 5.52E-08                  | AT2G39510 |
| AT3G63060 | 0.7347      | 1.6641      | 2.79E-10                | 6.94E-08                  | EDL3      |
| AT4G17350 | 0.8961      | 1.8611      | 2.99E-10                | 7.38E-08                  | AT4G17350 |
| AT3G01260 | 0.8552      | 1.809       | 5.86E-10                | 1.31E-07                  | AT3G01260 |
| AT5G14650 | 0.9594      | 1.9445      | 8.87E-10                | 1.90E-07                  | AT5G14650 |
| AT2G41190 | 0.7563      | 1.6892      | 2.26E-09                | 4.26E-07                  | AT2G41190 |
| AT3G62040 | 0.7693      | 1.7044      | 3.26E-09                | 5.74E-07                  | AT3G62040 |
| AT5G66460 | 0.6575      | 1.5774      | 4.44E-09                | 7.27E-07                  | MAN7      |
| AT5G15120 | 0.9821      | 1.9753      | 5.28E-09                | 8.44E-07                  | PCO1      |
| AT2G18980 | 0.9526      | 1.9353      | 5.27E-09                | 8.44E-07                  | PER16     |
| AT4G02290 | 0.6307      | 1.5484      | 5.61E-09                | 8.92E-07                  | AtGH9B13  |
| AT5G66400 | 0.9933      | 1.9907      | 6.32E-09                | 9.87E-07                  | RAB18     |
| AT3G28510 | 1.0331      | 2.0464      | 7.16E-09                | 1.10E-06                  | AT3G28510 |



|           |        |        |          |          |           |
|-----------|--------|--------|----------|----------|-----------|
| AT1G51830 | 0.7281 | 1.6564 | 7.26E-09 | 1.11E-06 | AT1G51830 |
| AT1G52040 | 1.0259 | 2.0362 | 1.45E-08 | 1.98E-06 | MBP1      |
| AT3G46270 | 1.0055 | 2.0076 | 2.67E-08 | 3.35E-06 | AT3G46270 |
| AT1G02205 | 0.8763 | 1.8357 | 2.95E-08 | 3.64E-06 | CER1      |
| AT2G26150 | 0.8859 | 1.8479 | 3.08E-08 | 3.77E-06 | HSFA2     |
| AT2G43570 | 0.9237 | 1.897  | 3.38E-08 | 4.00E-06 | CHI       |
| AT3G58810 | 0.9031 | 1.8701 | 4.64E-08 | 5.30E-06 | MTPA2     |
| AT1G60190 | 0.6567 | 1.5765 | 5.30E-08 | 6.01E-06 | PUB19     |
| AT1G32450 | 0.7334 | 1.6625 | 5.77E-08 | 6.47E-06 | NPF7.3    |
| AT4G24310 | 0.9726 | 1.9623 | 6.58E-08 | 7.23E-06 | AT4G24310 |
| AT5G01520 | 0.7678 | 1.7027 | 7.54E-08 | 8.16E-06 | AT5G01520 |
| AT1G47600 | 0.9195 | 1.8914 | 7.76E-08 | 8.32E-06 | TGG4      |
| AT4G08570 | 0.9695 | 1.9581 | 7.87E-08 | 8.41E-06 | AT4G08570 |
| AT1G01240 | 0.6685 | 1.5894 | 1.01E-07 | 1.06E-05 | AT1G01240 |
| AT3G04620 | 0.9161 | 1.887  | 1.10E-07 | 1.14E-05 | AT3G04620 |
| AT5G57050 | 0.7404 | 1.6707 | 1.22E-07 | 1.24E-05 | ABI2      |
| AT2G40130 | 0.7644 | 1.6986 | 1.27E-07 | 1.28E-05 | AT2G40130 |
| AT5G41610 | 0.6186 | 1.5354 | 2.05E-07 | 1.95E-05 | CHX18     |
| AT1G01360 | 0.6848 | 1.6075 | 2.10E-07 | 1.99E-05 | PYL9      |
| AT1G14080 | 0.8573 | 1.8116 | 2.16E-07 | 2.03E-05 | FUT6      |
| AT5G15500 | 0.9326 | 1.9087 | 2.58E-07 | 2.38E-05 | AT5G15500 |
| AT1G78990 | 0.7465 | 1.6777 | 3.13E-07 | 2.82E-05 | AT1G78990 |
| AT5G63350 | 0.902  | 1.8687 | 3.18E-07 | 2.86E-05 | AT5G63350 |
| AT4G22990 | 0.7189 | 1.6459 | 3.26E-07 | 2.89E-05 | AT4G22990 |
| AT4G23060 | 0.6805 | 1.6027 | 3.39E-07 | 2.98E-05 | IQD22     |
| AT1G49570 | 0.8946 | 1.8591 | 3.93E-07 | 3.39E-05 | PER10     |
| AT3G05650 | 0.842  | 1.7925 | 4.57E-07 | 3.86E-05 | AtRLP32   |
| AT1G68880 | 0.7838 | 1.7217 | 5.29E-07 | 4.34E-05 | AtbZIP    |
| AT1G44970 | 0.7073 | 1.6328 | 5.29E-07 | 4.34E-05 | PER9      |
| AT2G36270 | 0.7808 | 1.718  | 6.14E-07 | 5.03E-05 | ABIS      |
| AT3G61270 | 0.7195 | 1.6466 | 6.83E-07 | 5.44E-05 | AT3G61270 |
| AT4G35560 | 0.7296 | 1.6581 | 7.65E-07 | 6.05E-05 | AT4G35560 |
| AT4G01970 | 0.8342 | 1.7829 | 7.84E-07 | 6.14E-05 | RFS4      |
| AT1G19960 | 0.7848 | 1.7229 | 8.25E-07 | 6.44E-05 | AT1G19960 |
| AT2G18370 | 0.7368 | 1.6665 | 1.04E-06 | 7.97E-05 | LTP8      |
| AT2G47780 | 0.8182 | 1.7632 | 1.09E-06 | 8.24E-05 | AT2G47780 |
| AT5G54165 | 0.8639 | 1.82   | 1.11E-06 | 8.36E-05 | AT5G54165 |
| AT1G06080 | 0.7368 | 1.6665 | 1.14E-06 | 8.52E-05 | ADS1      |
| AT2G33380 | 0.841  | 1.7913 | 1.30E-06 | 9.44E-05 | PXG3      |
| AT5G05220 | 0.8333 | 1.7817 | 1.33E-06 | 9.61E-05 | AT5G05220 |
| AT4G12520 | 0.8216 | 1.7674 | 1.63E-06 | 0.0001   | AT4G12520 |
| AT2G40750 | 0.7568 | 1.6897 | 1.40E-06 | 0.0001   | WRKY54    |
| AT2G21130 | 0.6364 | 1.5545 | 1.55E-06 | 0.0001   | CYP19-2   |
| AT4G21930 | 0.8312 | 1.7792 | 1.81E-06 | 0.0001   | AT4G21930 |
| AT3G14360 | 0.6279 | 1.5453 | 2.16E-06 | 0.0001   | AT3G14360 |

|           |        |        |          |        |           |
|-----------|--------|--------|----------|--------|-----------|
| AT2G17036 | 0.7962 | 1.7365 | 3.31E-06 | 0.0002 | AT2G17036 |
| AT3G04570 | 0.7121 | 1.6381 | 3.49E-06 | 0.0002 | AHL19     |
| ATCG00490 | 0.6219 | 1.5389 | 3.99E-06 | 0.0002 | RBCL      |
| AT5G47060 | 0.5907 | 1.506  | 3.60E-06 | 0.0002 | AT5G47060 |
| AT3G22100 | 0.7904 | 1.7296 | 5.00E-06 | 0.0003 | BHLH117   |
| AT2G25810 | 0.6979 | 1.6221 | 6.15E-06 | 0.0003 | TIP4-1    |
| AT1G77330 | 0.6336 | 1.5514 | 4.87E-06 | 0.0003 | AT1G77330 |
| AT1G56320 | 0.7337 | 1.6629 | 4.86E-06 | 0.0003 | AT1G56320 |
| AT5G47640 | 0.6885 | 1.6116 | 5.58E-06 | 0.0003 | NFYB2     |
| AT5G01870 | 0.7845 | 1.7225 | 6.28E-06 | 0.0004 | LTP10     |
| AT3G04630 | 0.6381 | 1.5563 | 8.18E-06 | 0.0004 | WDL1      |
| AT5G47635 | 0.8068 | 1.7493 | 6.25E-06 | 0.0004 | AT5G47635 |
| AT5G53320 | 0.6092 | 1.5255 | 7.29E-06 | 0.0004 | AT5G53320 |
| AT2G37700 | 0.7979 | 1.7386 | 1.04E-05 | 0.0005 | AT2G37700 |
| AT5G44420 | 0.7801 | 1.7172 | 8.70E-06 | 0.0005 | PDF1.2A   |
| AT2G41070 | 0.6322 | 1.55   | 1.06E-05 | 0.0005 | DPBF4     |
| AT2G39530 | 0.7787 | 1.7156 | 1.20E-05 | 0.0006 | AT2G39530 |
| AT4G31910 | 0.7453 | 1.6763 | 1.18E-05 | 0.0006 | AT4G31910 |
| AT4G31320 | 0.7146 | 1.641  | 1.24E-05 | 0.0006 | AT4G31320 |
| AT3G63430 | 0.594  | 1.5095 | 1.33E-05 | 0.0006 | AT3G63430 |
| AT3G62280 | 0.7282 | 1.6566 | 1.57E-05 | 0.0007 | AT3G62280 |
| AT1G08430 | 0.7231 | 1.6508 | 1.58E-05 | 0.0007 | ALMT1     |
| AT3G05640 | 0.7147 | 1.6411 | 1.60E-05 | 0.0007 | AT3G05640 |
| AT2G37180 | 0.6938 | 1.6176 | 1.48E-05 | 0.0007 | PIP2-3    |
| AT2G19810 | 0.6416 | 1.5601 | 1.55E-05 | 0.0007 | AT2G19810 |
| AT3G11410 | 0.6123 | 1.5286 | 1.63E-05 | 0.0007 | PP2CA     |
| AT3G62090 | 0.5964 | 1.5119 | 1.59E-05 | 0.0007 | PIF6      |
| AT5G57090 | 0.7228 | 1.6503 | 1.69E-05 | 0.0008 | PIN2      |
| AT5G58160 | 0.613  | 1.5294 | 1.89E-05 | 0.0008 | AT5G58160 |
| AT3G58550 | 0.726  | 1.6541 | 1.90E-05 | 0.0008 | AT3G58550 |
| AT5G10580 | 0.6768 | 1.5986 | 1.69E-05 | 0.0008 | AT5G10580 |
| AT5G05840 | 0.7716 | 1.7071 | 1.94E-05 | 0.0009 | AT5G05840 |
| AT3G06160 | 0.75   | 1.6818 | 2.04E-05 | 0.0009 | REM21     |
| AT3G49860 | 0.6658 | 1.5864 | 1.96E-05 | 0.0009 | ATARLA1B  |
| AT1G31880 | 0.5875 | 1.5027 | 2.34E-05 | 0.001  | BRX       |
| AT1G13590 | 0.7624 | 1.6963 | 2.49E-05 | 0.0011 | PSK1      |
| AT4G22810 | 0.7449 | 1.6758 | 2.75E-05 | 0.0011 | AHL24     |
| AT2G47770 | 0.7379 | 1.6677 | 2.80E-05 | 0.0011 | TSPO      |
| AT3G16440 | 0.7183 | 1.6452 | 2.54E-05 | 0.0011 | JAL32     |
| AT2G02120 | 0.6832 | 1.6057 | 2.60E-05 | 0.0011 | PDF2.1    |
| AT4G38400 | 0.5889 | 1.5041 | 2.73E-05 | 0.0011 | EXLA2     |
| AT1G01570 | 0.6648 | 1.5854 | 2.99E-05 | 0.0012 | AT1G01570 |
| AT3G45160 | 0.6138 | 1.5302 | 3.03E-05 | 0.0012 | AT3G45160 |
| AT2G18150 | 0.5901 | 1.5053 | 2.99E-05 | 0.0012 | PER15     |
| AT5G63660 | 0.736  | 1.6656 | 3.90E-05 | 0.0015 | PDF2.5    |

|           |        |        |          |        |           |
|-----------|--------|--------|----------|--------|-----------|
| AT1G53270 | 0.665  | 1.5856 | 3.84E-05 | 0.0015 | ABCG10    |
| AT1G53170 | 0.6604 | 1.5806 | 4.00E-05 | 0.0015 | ERF8      |
| AT3G21330 | 0.732  | 1.6609 | 4.23E-05 | 0.0016 | BHLH87    |
| AT1G50060 | 0.7289 | 1.6574 | 4.35E-05 | 0.0016 | AT1G50060 |
| AT5G60530 | 0.7365 | 1.6662 | 4.50E-05 | 0.0017 | AT5G60530 |
| AT3G07970 | 0.7242 | 1.652  | 4.41E-05 | 0.0017 | QRT2      |
| AT3G53160 | 0.6217 | 1.5387 | 4.74E-05 | 0.0017 | UGT73C7   |
| AT5G53710 | 0.7219 | 1.6494 | 4.85E-05 | 0.0018 | AT5G53710 |
| AT1G56600 | 0.709  | 1.6347 | 5.00E-05 | 0.0018 | GOLS2     |
| AT3G56275 | 0.7291 | 1.6576 | 5.47E-05 | 0.002  | AT3G56275 |
| AT5G45070 | 0.7217 | 1.6492 | 5.62E-05 | 0.002  | PP2A8     |
| AT2G35950 | 0.713  | 1.6393 | 5.75E-05 | 0.002  | EDA12     |
| AT5G07475 | 0.6263 | 1.5436 | 5.66E-05 | 0.002  | AT5G07475 |
| AT5G10210 | 0.6812 | 1.6034 | 5.65E-05 | 0.002  | AT5G10210 |
| AT1G02180 | 0.6074 | 1.5235 | 5.68E-05 | 0.002  | AT1G02180 |
| AT3G21890 | 0.6452 | 1.564  | 5.88E-05 | 0.0021 | AT3G21890 |
| AT3G27250 | 0.7242 | 1.652  | 6.30E-05 | 0.0022 | AT3G27250 |
| AT5G54370 | 0.7209 | 1.6482 | 6.80E-05 | 0.0023 | AT5G54370 |
| AT4G10510 | 0.7166 | 1.6433 | 6.93E-05 | 0.0024 | AT4G10510 |
| AT2G42530 | 0.6902 | 1.6135 | 7.10E-05 | 0.0024 | COR15B    |
| AT5G47920 | 0.6209 | 1.5378 | 7.20E-05 | 0.0024 | AT5G47920 |
| AT5G15130 | 0.708  | 1.6336 | 7.53E-05 | 0.0025 | WRKY72    |
| AT5G62340 | 0.6803 | 1.6025 | 7.38E-05 | 0.0025 | AT5G62340 |
| AT1G61260 | 0.6659 | 1.5865 | 8.23E-05 | 0.0027 | AT1G61260 |
| AT1G75060 | 0.6154 | 1.532  | 8.14E-05 | 0.0027 | AT1G75060 |
| AT5G28370 | 0.711  | 1.6369 | 8.58E-05 | 0.0028 | AT5G28370 |
| AT1G80240 | 0.6449 | 1.5637 | 9.10E-05 | 0.0029 | AT1G80240 |
| AT1G01030 | 0.6287 | 1.5461 | 0.0001   | 0.0033 | NGA3      |
| AT1G66950 | 0.696  | 1.62   | 0.0001   | 0.0034 | ABCG39    |
| AT5G66280 | 0.647  | 1.5659 | 0.0001   | 0.0038 | GMD1      |
| AT5G02020 | 0.6814 | 1.6036 | 0.0001   | 0.0039 | SIS       |
| AT2G48080 | 0.5984 | 1.5141 | 0.0001   | 0.0039 | AT2G48080 |
| AT4G19690 | 0.6661 | 1.5868 | 0.0001   | 0.004  | IRT1      |
| AT4G25692 | 0.6214 | 1.5384 | 0.0002   | 0.0044 | CPuORF13  |
| AT5G45080 | 0.6833 | 1.6058 | 0.0002   | 0.0046 | PP2A6     |
| AT2G45430 | 0.6448 | 1.5635 | 0.0002   | 0.0046 | AHL22     |
| AT2G37210 | 0.6381 | 1.5563 | 0.0002   | 0.0046 | LOG3      |
| AT2G24720 | 0.6051 | 1.5211 | 0.0002   | 0.0046 | GLR2.2    |
| AT3G13020 | 0.594  | 1.5095 | 0.0002   | 0.0046 | AT3G13020 |
| AT3G23175 | 0.5987 | 1.5144 | 0.0002   | 0.0048 | AT3G23175 |
| AT5G13870 | 0.5881 | 1.5033 | 0.0002   | 0.0048 | XTH5      |
| AT5G60520 | 0.6725 | 1.5938 | 0.0002   | 0.0053 | AT5G60520 |
| AT4G39340 | 0.6664 | 1.5871 | 0.0002   | 0.0055 | EC1.4     |
| AT3G53235 | 0.6709 | 1.592  | 0.0002   | 0.0056 | AT3G53235 |
| AT1G72870 | 0.6645 | 1.585  | 0.0002   | 0.0057 | AT1G72870 |

|           |        |        |          |        |           |
|-----------|--------|--------|----------|--------|-----------|
| AT2G23630 | 0.6664 | 1.5871 | 0.0002   | 0.0059 | sks16     |
| AT1G68150 | 0.6281 | 1.5456 | 0.0002   | 0.0059 | WRKY9     |
| AT5G24080 | 0.6315 | 1.5492 | 0.0002   | 0.0062 | AT5G24080 |
| AT1G72360 | 0.6349 | 1.5528 | 0.0003   | 0.0064 | ERF073    |
| AT2G32620 | 0.637  | 1.5551 | 0.0003   | 0.0066 | CSLB2     |
| AT3G25190 | 0.6057 | 1.5217 | 0.0003   | 0.0068 | AT3G25190 |
| AT4G03540 | 0.6572 | 1.577  | 0.0003   | 0.0069 | AT4G03540 |
| AT5G57123 | 0.6543 | 1.5739 | 0.0003   | 0.007  | AT5G57123 |
| AT4G28140 | 0.6433 | 1.5619 | 0.0003   | 0.007  | ERF054    |
| AT1G67330 | 0.5928 | 1.5081 | 0.0003   | 0.0074 | AT1G67330 |
| AT2G28160 | 0.6438 | 1.5624 | 0.0003   | 0.0075 | FIT       |
| AT1G21340 | 0.6164 | 1.533  | 0.0003   | 0.0076 | DOF1.2    |
| AT5G13990 | 0.65   | 1.5692 | 0.0003   | 0.0078 | ATEXO70C2 |
| AT1G51470 | 0.6419 | 1.5604 | 0.0003   | 0.0079 | TGG5      |
| AT3G10040 | 0.5976 | 1.5132 | 0.0003   | 0.008  | AT3G10040 |
| AT2G20880 | 0.6384 | 1.5566 | 0.0004   | 0.0083 | ERF053    |
| AT5G50760 | 0.6264 | 1.5437 | 0.0004   | 0.0089 | AT5G50760 |
| AT5G17540 | 0.6404 | 1.5588 | 0.0004   | 0.0089 | AT5G17540 |
| AT1G62280 | 0.5963 | 1.5118 | 0.0004   | 0.0092 | SLAH1     |
| AT4G33467 | 0.6101 | 1.5264 | 0.0004   | 0.0095 | AT4G33467 |
| AT1G56680 | 0.637  | 1.5551 | 0.0004   | 0.0096 | AT1G56680 |
| AT3G15240 | 0.6289 | 1.5464 | 0.0004   | 0.0096 | AT3G15240 |
| AT3G61930 | 0.6224 | 1.5394 | 0.0004   | 0.0098 | AT3G61930 |
| AT1G10810 | 0.6104 | 1.5267 | 0.0005   | 0.0099 | AT1G10810 |
| AT1G07550 | 0.6244 | 1.5416 | 0.0005   | 0.01   | AT1G07550 |
| AT3G24300 | 0.5919 | 1.5073 | 0.0005   | 0.01   | AMT1-3    |
| AT4G21930 | 0.8312 | 1.7792 | 1.81E-06 | 0.0001 | AT4G21930 |
| AT3G14360 | 0.6279 | 1.5453 | 2.16E-06 | 0.0001 | AT3G14360 |
| AT2G17036 | 0.7962 | 1.7365 | 3.31E-06 | 0.0002 | AT2G17036 |
| AT3G04570 | 0.7121 | 1.6381 | 3.49E-06 | 0.0002 | AHL19     |
| ATCG00490 | 0.6219 | 1.5389 | 3.99E-06 | 0.0002 | RBCL      |
| AT5G47060 | 0.5907 | 1.506  | 3.60E-06 | 0.0002 | AT5G47060 |
| AT3G22100 | 0.7904 | 1.7296 | 5.00E-06 | 0.0003 | BHLH117   |
| AT2G25810 | 0.6979 | 1.6221 | 6.15E-06 | 0.0003 | TIP4-1    |
| AT1G77330 | 0.6336 | 1.5514 | 4.87E-06 | 0.0003 | AT1G77330 |
| AT1G56320 | 0.7337 | 1.6629 | 4.86E-06 | 0.0003 | AT1G56320 |
| AT5G47640 | 0.6885 | 1.6116 | 5.58E-06 | 0.0003 | NFYB2     |
| AT5G01870 | 0.7845 | 1.7225 | 6.28E-06 | 0.0004 | LTP10     |
| AT3G04630 | 0.6381 | 1.5563 | 8.18E-06 | 0.0004 | WDL1      |
| AT5G47635 | 0.8068 | 1.7493 | 6.25E-06 | 0.0004 | AT5G47635 |
| AT5G53320 | 0.6092 | 1.5255 | 7.29E-06 | 0.0004 | AT5G53320 |
| AT2G37700 | 0.7979 | 1.7386 | 1.04E-05 | 0.0005 | AT2G37700 |
| AT5G44420 | 0.7801 | 1.7172 | 8.70E-06 | 0.0005 | PDF1.2A   |
| AT2G41070 | 0.6322 | 1.55   | 1.06E-05 | 0.0005 | DPBF4     |
| AT2G39530 | 0.7787 | 1.7156 | 1.20E-05 | 0.0006 | AT2G39530 |

|           |        |        |          |        |           |
|-----------|--------|--------|----------|--------|-----------|
| AT4G31910 | 0.7453 | 1.6763 | 1.18E-05 | 0.0006 | AT4G31910 |
| AT4G31320 | 0.7146 | 1.641  | 1.24E-05 | 0.0006 | AT4G31320 |
| AT3G63430 | 0.594  | 1.5095 | 1.33E-05 | 0.0006 | AT3G63430 |
| AT3G62280 | 0.7282 | 1.6566 | 1.57E-05 | 0.0007 | AT3G62280 |
| AT1G08430 | 0.7231 | 1.6508 | 1.58E-05 | 0.0007 | ALMT1     |
| AT3G05640 | 0.7147 | 1.6411 | 1.60E-05 | 0.0007 | AT3G05640 |
| AT2G37180 | 0.6938 | 1.6176 | 1.48E-05 | 0.0007 | PIP2-3    |
| AT2G19810 | 0.6416 | 1.5601 | 1.55E-05 | 0.0007 | AT2G19810 |
| AT3G11410 | 0.6123 | 1.5286 | 1.63E-05 | 0.0007 | PP2CA     |
| AT3G62090 | 0.5964 | 1.5119 | 1.59E-05 | 0.0007 | PIF6      |
| AT5G57090 | 0.7228 | 1.6503 | 1.69E-05 | 0.0008 | PIN2      |
| AT5G58160 | 0.613  | 1.5294 | 1.89E-05 | 0.0008 | AT5G58160 |
| AT3G58550 | 0.726  | 1.6541 | 1.90E-05 | 0.0008 | AT3G58550 |
| AT5G10580 | 0.6768 | 1.5986 | 1.69E-05 | 0.0008 | AT5G10580 |
| AT5G05840 | 0.7716 | 1.7071 | 1.94E-05 | 0.0009 | AT5G05840 |
| AT3G06160 | 0.75   | 1.6818 | 2.04E-05 | 0.0009 | REM21     |
| AT3G49860 | 0.6658 | 1.5864 | 1.96E-05 | 0.0009 | ATARLA1B  |
| AT1G31880 | 0.5875 | 1.5027 | 2.34E-05 | 0.001  | BRX       |
| AT1G13590 | 0.7624 | 1.6963 | 2.49E-05 | 0.0011 | PSK1      |
| AT4G22810 | 0.7449 | 1.6758 | 2.75E-05 | 0.0011 | AHL24     |
| AT2G47770 | 0.7379 | 1.6677 | 2.80E-05 | 0.0011 | TSPO      |
| AT3G16440 | 0.7183 | 1.6452 | 2.54E-05 | 0.0011 | JAL32     |
| AT2G02120 | 0.6832 | 1.6057 | 2.60E-05 | 0.0011 | PDF2.1    |
| AT4G38400 | 0.5889 | 1.5041 | 2.73E-05 | 0.0011 | EXLA2     |
| AT1G01570 | 0.6648 | 1.5854 | 2.99E-05 | 0.0012 | AT1G01570 |
| AT3G45160 | 0.6138 | 1.5302 | 3.03E-05 | 0.0012 | AT3G45160 |
| AT2G18150 | 0.5901 | 1.5053 | 2.99E-05 | 0.0012 | PER15     |
| AT5G63660 | 0.736  | 1.6656 | 3.90E-05 | 0.0015 | PDF2.5    |
| AT1G53270 | 0.665  | 1.5856 | 3.84E-05 | 0.0015 | ABCG10    |
| AT1G53170 | 0.6604 | 1.5806 | 4.00E-05 | 0.0015 | ERF8      |
| AT3G21330 | 0.732  | 1.6609 | 4.23E-05 | 0.0016 | BHLH87    |
| AT1G50060 | 0.7289 | 1.6574 | 4.35E-05 | 0.0016 | AT1G50060 |
| AT5G60530 | 0.7365 | 1.6662 | 4.50E-05 | 0.0017 | AT5G60530 |
| AT3G07970 | 0.7242 | 1.652  | 4.41E-05 | 0.0017 | QRT2      |
| AT3G53160 | 0.6217 | 1.5387 | 4.74E-05 | 0.0017 | UGT73C7   |
| AT5G53710 | 0.7219 | 1.6494 | 4.85E-05 | 0.0018 | AT5G53710 |
| AT1G56600 | 0.709  | 1.6347 | 5.00E-05 | 0.0018 | GOLS2     |
| AT3G56275 | 0.7291 | 1.6576 | 5.47E-05 | 0.002  | AT3G56275 |
| AT5G45070 | 0.7217 | 1.6492 | 5.62E-05 | 0.002  | PP2A8     |
| AT2G35950 | 0.713  | 1.6393 | 5.75E-05 | 0.002  | EDA12     |
| AT5G07475 | 0.6263 | 1.5436 | 5.66E-05 | 0.002  | AT5G07475 |
| AT5G10210 | 0.6812 | 1.6034 | 5.65E-05 | 0.002  | AT5G10210 |
| AT1G02180 | 0.6074 | 1.5235 | 5.68E-05 | 0.002  | AT1G02180 |
| AT3G21890 | 0.6452 | 1.564  | 5.88E-05 | 0.0021 | AT3G21890 |
| AT3G27250 | 0.7242 | 1.652  | 6.30E-05 | 0.0022 | AT3G27250 |

|           |        |        |          |        |           |
|-----------|--------|--------|----------|--------|-----------|
| AT5G54370 | 0.7209 | 1.6482 | 6.80E-05 | 0.0023 | AT5G54370 |
| AT4G10510 | 0.7166 | 1.6433 | 6.93E-05 | 0.0024 | AT4G10510 |
| AT2G42530 | 0.6902 | 1.6135 | 7.10E-05 | 0.0024 | COR15B    |
| AT5G47920 | 0.6209 | 1.5378 | 7.20E-05 | 0.0024 | AT5G47920 |
| AT5G15130 | 0.708  | 1.6336 | 7.53E-05 | 0.0025 | WRKY72    |
| AT5G62340 | 0.6803 | 1.6025 | 7.38E-05 | 0.0025 | AT5G62340 |
| AT1G61260 | 0.6659 | 1.5865 | 8.23E-05 | 0.0027 | AT1G61260 |
| AT1G75060 | 0.6154 | 1.532  | 8.14E-05 | 0.0027 | AT1G75060 |
| AT5G28370 | 0.711  | 1.6369 | 8.58E-05 | 0.0028 | AT5G28370 |
| AT1G80240 | 0.6449 | 1.5637 | 9.10E-05 | 0.0029 | AT1G80240 |
| AT1G01030 | 0.6287 | 1.5461 | 0.0001   | 0.0033 | NGA3      |
| AT1G66950 | 0.696  | 1.62   | 0.0001   | 0.0034 | ABCG39    |
| AT5G66280 | 0.647  | 1.5659 | 0.0001   | 0.0038 | GMD1      |
| AT5G02020 | 0.6814 | 1.6036 | 0.0001   | 0.0039 | SIS       |
| AT2G48080 | 0.5984 | 1.5141 | 0.0001   | 0.0039 | AT2G48080 |
| AT4G19690 | 0.6661 | 1.5868 | 0.0001   | 0.004  | IRT1      |
| AT4G25692 | 0.6214 | 1.5384 | 0.0002   | 0.0044 | CPuORF13  |
| AT5G45080 | 0.6833 | 1.6058 | 0.0002   | 0.0046 | PP2A6     |
| AT2G45430 | 0.6448 | 1.5635 | 0.0002   | 0.0046 | AHL22     |
| AT2G37210 | 0.6381 | 1.5563 | 0.0002   | 0.0046 | LOG3      |
| AT2G24720 | 0.6051 | 1.5211 | 0.0002   | 0.0046 | GLR2.2    |
| AT3G13020 | 0.594  | 1.5095 | 0.0002   | 0.0046 | AT3G13020 |
| AT3G23175 | 0.5987 | 1.5144 | 0.0002   | 0.0048 | AT3G23175 |
| AT5G13870 | 0.5881 | 1.5033 | 0.0002   | 0.0048 | XTH5      |
| AT5G60520 | 0.6725 | 1.5938 | 0.0002   | 0.0053 | AT5G60520 |
| AT4G39340 | 0.6664 | 1.5871 | 0.0002   | 0.0055 | EC1.4     |
| AT3G53235 | 0.6709 | 1.592  | 0.0002   | 0.0056 | AT3G53235 |
| AT1G72870 | 0.6645 | 1.585  | 0.0002   | 0.0057 | AT1G72870 |
| AT2G23630 | 0.6664 | 1.5871 | 0.0002   | 0.0059 | sks16     |
| AT1G68150 | 0.6281 | 1.5456 | 0.0002   | 0.0059 | WRKY9     |
| AT5G24080 | 0.6315 | 1.5492 | 0.0002   | 0.0062 | AT5G24080 |
| AT1G72360 | 0.6349 | 1.5528 | 0.0003   | 0.0064 | ERF073    |
| AT2G32620 | 0.637  | 1.5551 | 0.0003   | 0.0066 | CSLB2     |
| AT3G25190 | 0.6057 | 1.5217 | 0.0003   | 0.0068 | AT3G25190 |
| AT4G03540 | 0.6572 | 1.577  | 0.0003   | 0.0069 | AT4G03540 |
| AT5G57123 | 0.6543 | 1.5739 | 0.0003   | 0.007  | AT5G57123 |
| AT4G28140 | 0.6433 | 1.5619 | 0.0003   | 0.007  | ERF054    |
| AT1G67330 | 0.5928 | 1.5081 | 0.0003   | 0.0074 | AT1G67330 |
| AT2G28160 | 0.6438 | 1.5624 | 0.0003   | 0.0075 | FIT       |
| AT1G21340 | 0.6164 | 1.533  | 0.0003   | 0.0076 | DOF1.2    |
| AT5G13990 | 0.65   | 1.5692 | 0.0003   | 0.0078 | ATEXO70C2 |
| AT1G51470 | 0.6419 | 1.5604 | 0.0003   | 0.0079 | TGG5      |
| AT3G10040 | 0.5976 | 1.5132 | 0.0003   | 0.008  | AT3G10040 |
| AT2G20880 | 0.6384 | 1.5566 | 0.0004   | 0.0083 | ERF053    |
| AT5G50760 | 0.6264 | 1.5437 | 0.0004   | 0.0089 | AT5G50760 |

|           |        |        |        |        |           |
|-----------|--------|--------|--------|--------|-----------|
| AT5G17540 | 0.6404 | 1.5588 | 0.0004 | 0.0089 | AT5G17540 |
| AT1G62280 | 0.5963 | 1.5118 | 0.0004 | 0.0092 | SLAH1     |
| AT4G33467 | 0.6101 | 1.5264 | 0.0004 | 0.0095 | AT4G33467 |
| AT1G56680 | 0.637  | 1.5551 | 0.0004 | 0.0096 | AT1G56680 |
| AT3G15240 | 0.6289 | 1.5464 | 0.0004 | 0.0096 | AT3G15240 |
| AT3G61930 | 0.6224 | 1.5394 | 0.0004 | 0.0098 | AT3G61930 |
| AT1G10810 | 0.6104 | 1.5267 | 0.0005 | 0.0099 | AT1G10810 |
| AT1G07550 | 0.6244 | 1.5416 | 0.0005 | 0.01   | AT1G07550 |
| AT3G24300 | 0.5919 | 1.5073 | 0.0005 | 0.01   | AMT1-3    |
| AT1G52060 | 0.6312 | 1.5489 | 0.0005 | 0.0101 | JAL9      |
| AT2G30340 | 0.6302 | 1.5478 | 0.0005 | 0.0101 | LBD13     |
| AT5G52300 | 0.6161 | 1.5327 | 0.0005 | 0.0101 | LTI65     |
| AT1G34844 | 0.6327 | 1.5504 | 0.0005 | 0.0101 | AT1G34844 |
| AT5G40000 | 0.6225 | 1.5395 | 0.0005 | 0.0104 | AT5G40000 |
| AT5G50360 | 0.586  | 1.5011 | 0.0005 | 0.0105 | AT5G50360 |
| AT5G53390 | 0.6146 | 1.5311 | 0.0005 | 0.0112 | AT5G53390 |
| AT1G68430 | 0.5903 | 1.5056 | 0.0006 | 0.0114 | AT1G68430 |
| AT2G35600 | 0.5956 | 1.5111 | 0.0006 | 0.0119 | BRXL1     |
| ATMG01360 | 0.6191 | 1.5359 | 0.0006 | 0.0124 | COX1      |
| AT5G48940 | 0.6033 | 1.5192 | 0.0007 | 0.0129 | RCH1      |
| AT2G34850 | 0.6006 | 1.5164 | 0.0008 | 0.0152 | MEE25     |
| AT5G04970 | 0.6014 | 1.5171 | 0.0009 | 0.0158 | PME47     |
| AT3G52160 | 0.5999 | 1.5156 | 0.0009 | 0.0158 | KCS15     |
| AT3G55150 | 0.5926 | 1.5079 | 0.001  | 0.0171 | ATEXO70H1 |
| AT2G31920 | 0.5896 | 1.5049 | 0.0011 | 0.0188 | AT2G31920 |
| AT3G54770 | 0.5897 | 1.5049 | 0.0011 | 0.019  | ARP1      |
| AT3G49190 | 0.587  | 1.5021 | 0.0012 | 0.0202 | AT3G49190 |

Table S2-Indolic and aliphatic glucosinolate levels as measured by HPLC in the Col-0 and *iaa5,6,19* mutants over a period of 3 hours. Each value is the mean +/- SE (nmol/mgFW)

| Indolic GLS                                              | Time (min)      |                 |                 |                 |
|----------------------------------------------------------|-----------------|-----------------|-----------------|-----------------|
|                                                          | 0 min           | 30 min          | 60 min          | 180 min         |
| <b>Indol-3-ylmethyl glucosinolate (I3M)</b>              |                 |                 |                 |                 |
| Col-0                                                    | 0.0020 +/-0.002 | 0.0028 +/-0.002 | 0.0022 +/-0.002 | 0.0023 +/-0.002 |
| <i>iaa5,6,19</i>                                         | 0.0043 +/-0.004 | 0.0029 +/-0.002 | 0.0016 +/-0.001 | 0.0026 +/-0.002 |
| <b>4-methylthioalkyl glucosinolate (4-MT)</b>            |                 |                 |                 |                 |
| Col-0                                                    | 0.0195 +/-0.001 | 0.0115 +/-0.000 | 0.0100 +/-0.000 | 0.0078 +/-0.000 |
| <i>iaa5,6,19</i>                                         | 0.0160 +/-0.001 | 0.0131 +/-0.001 | 0.0106 +/-0.000 | 0.0112 +/-0.000 |
| <b>N-methoxy-indol-3-ylmethyl glucosinolate (4NMIOM)</b> |                 |                 |                 |                 |
| Col-0                                                    | 0.1021 +/-0.003 | 0.0833 +/-0.006 | 0.1025 +/-0.003 | 0.0820 +/-0.009 |
| <i>iaa5,6,19</i>                                         | 0.088 +/-0.005  | 0.0656 +/-0.005 | 0.0727 +/-0.006 | 0.0726 +/-0.003 |
| <b>8-methylthioalkyl glucosinolate (8-MT)</b>            |                 |                 |                 |                 |
| Col-0                                                    | 0.0845 +/-0.019 | 0.0727 +/-0.021 | 0.0686 +/-0.020 | 0.0451 +/-0.016 |
| <i>iaa5,6,19</i>                                         | 0.0891 +/-0.038 | 0.0592 +/-0.019 | 0.0588 +/-0.017 | 0.0535 +/-0.023 |
| <b>Aliphatic GLS</b>                                     |                 |                 |                 |                 |
| <b>3-Methylsulfinylpropyl glucosinolate (3-MSO)</b>      |                 |                 |                 |                 |
| Col-0                                                    | 0.0329 +/-0.004 | 0.0337 +/-0.001 | 0.0296 +/-0.006 | 0.0246 +/-0.005 |
| <i>iaa5,6,19</i>                                         | 0.0354 +/-0.003 | 0.0123 +/-0.003 | 0.0185 +/-0.005 | 0.0143 +/-0.004 |
| <b>4-Methylsulfinylbutyl glucosinolate (4-MSO)</b>       |                 |                 |                 |                 |
| Col-0                                                    | 0.2287 +/-0.032 | 0.2080 +/-0.030 | 0.2511 +/-0.018 | 0.2517 +/-0.021 |
| <i>iaa5,6,19</i>                                         | 0.2460 +/-0.030 | 0.1767 +/-0.016 | 0.2022 +/-0.018 | 0.2005 +/-0.025 |
| <b>5-Methylsulfinylpentyl glucosinolate (5-MSO)</b>      |                 |                 |                 |                 |
| Col-0                                                    | 0.0155 +/-0.000 | 0.0126 +/-0.000 | 0.0148 +/-0.001 | 0.0142 +/-0.001 |
| <i>iaa5,6,19</i>                                         | 0.0147 +/-0.001 | 0.0141 +/-0.001 | 0.0121 +/-0.001 | 0.0134 +/-0.002 |
| <b>7-Methylsulfinylheptyl glucosinolate (7-MSO)</b>      |                 |                 |                 |                 |
| Col-0                                                    | 0.0130 +/-0.000 | 0.0119 +/-0.000 | 0.0127 +/-0.001 | 0.0112 +/-0.001 |
| <i>iaa5,6,19</i>                                         | 0.0150 +/-0.000 | 0.0123 +/-0.000 | 0.0141 +/-0.001 | 0.0166 +/-0.001 |
| <b>8-methylsulfinyloctyl glucosinolate (8-MSO)</b>       |                 |                 |                 |                 |
| Col-0                                                    | 0.0461 +/-0.009 | 0.0396 +/-0.006 | 0.0467 +/-0.011 | 0.0390 +/-0.012 |
| <i>iaa5,6,19</i>                                         | 0.0463 +/-0.013 | 0.0335 +/-0.005 | 0.0375 +/-0.012 | 0.0407 +/-0.009 |



**Table S3. Primers used in this study**

**qPCR**

| Primer Numb | Primer Name | Primer Sequence, 5'-3'     | Primer Purpose      |
|-------------|-------------|----------------------------|---------------------|
| MS433       | qMYB29 F    | CGTTGATTGCTTACCGACT        | qPCR of MYB29       |
| MS434       | qMYB29 R    | AGTGACCCTATAGTGGACCTTACT   | Do                  |
| MS435       | qCYP79F1 F  | CTTGACGTAAGTGTGCTTTGTTG    | qPCR of CYP79F1     |
| MS436       | qCYP79F1 R  | GCTACTCCGAATGTTTGATCG      | Do                  |
| MS437       | qCYP79F2 F  | TGATGTGTTTCGACGCTTTG       | qPCR of CYP79F2     |
| MS438       | qCYP79F2 R  | TATAGCGTTTTTCGGCAATG       | Do                  |
| MS439       | qCYP83A1 F  | TGGCAATCGTCTCTATCTTTTC     | qPCR of CYP83A1     |
| MS440       | qCYP83A1 R  | GACATCATGTGAATTTGCTTCC     | Do                  |
| MS441       | qSUR2 F     | CCATCAAATTCACTCACGAAAATGTC | qPCR of CYP8B1/SUR2 |
| MS442       | qSUR2 R     | AAGGTAAGTCATGGCCCATACCACC  | Do                  |
| MS443       | qSUR1 F     | CCGGCAAAGGCAATTCTTACGG     | qPCR of SUR1        |
| MS444       | qSUR1 R     | TCATATAATCAGCAACGGCTCGTC   | Do                  |
| MS445       | qMYB28 F    | AGACTGCGATGGACCACTACC      | qPCR of MYB28       |
| MS446       | qMYB28 R    | TCTCGCTATGACCGACCACTTG     | Do                  |
| MS451       | qWRKY63 F   | AACATCGATCACAAGGCTGTGG     | qPCR of WRKY63      |
| MS452       | qWRKY63 R   | TCTTGAGGATGTTAGCGCATCCC    | Do                  |

**Genotyping and cloning**

|       |                                 |                                                  |                                                                                 |
|-------|---------------------------------|--------------------------------------------------|---------------------------------------------------------------------------------|
| MS446 | qMYB28 R                        | TCTCGCTATGACCGACCACTTG                           | Genotyping MYB28 OE                                                             |
| MS457 | genoMYB29 1R                    | TCATATGAAGTTCTTGTGCTGCTG                         | Genotyping MYB29 OE                                                             |
|       | 35S F                           | GGGATGACGCACAATCCCACTATC                         | Genotyping 35S promoter in MYB28 and MYB29 OE                                   |
| MS459 | cWRKY63_F                       | <u>CACCTA</u> ATATGTTGCTCAACTTTCATAGGAC          | For cloning of WRKY63 promoter +genomic DNA without STOP codon into pENTR/D/GW. |
| MS460 | cWRKY63_R                       | AAACAACATCAGGTCTTCCGA                            | Do                                                                              |
| MS461 | sWRKY63_1F                      | ATTGAAGTTTCCACGCTAT                              | Sequencing WRKY63                                                               |
| MS462 | sWRKY63_2F                      | CGAGACATGGCAGGTCTTGT                             | Do                                                                              |
| MS463 | sWRKY63_3F                      | CCTTTGGGGTGCATGATAATACG                          | Do                                                                              |
| MS464 | sWRKY63_1R                      | GTTGTCGAGGACCGTCTTGA                             | Do                                                                              |
| MS465 | sWRKY63_2R                      | GCATAGCAGTTTTGGTCTTTTGC                          | Do                                                                              |
| MS466 | sWRKY63_3R                      | ACAACATCAGGTCTTCCGATGA                           | Do                                                                              |
| MS468 | clAA19g_2F                      | GGACGTGGGAACATGCTTGTAGT                          | Cloning IAA19pro-IAA19g in pCR8-GW-TOPO                                         |
| MS425 | clAA19g_R                       | ACTCAACACTCAAGAAACAAGTAGTGT                      | Do                                                                              |
| MS469 | slAA19_F                        | TCTCTCATGTGACCGACCAC                             | Sequencing IAA19                                                                |
| MS470 | slAA19_1R                       | GCGAGCATCCAGTCTCCATC                             | Do                                                                              |
| MS471 | slAA19_2R                       | TCAACACTCAAGAAACAAGTAGTGT                        | Do                                                                              |
| MS474 | clAA19_Ncol F                   | <u>GCCCCATGGAT</u> GAGAGAAGGAAGGACTCGG           | Cloning IAA19 genomic with 3'UTR in pGREENII-0179-GC1p binary                   |
| MS475 | clAA19_BsaBI R                  | <u>GCCGATACGCAT</u> CACTCAACACTCAAGAAACAAGTAGTGT | Do                                                                              |
| MS476 | cDREB2A_Ncol F                  | <u>GCCCCATGGAT</u> GGCAGTTTATGATCAGAGTGGA        | Cloning DREB2A CDs in pGREENII-0179-GC1p binary                                 |
| MS477 | cDREB2A_BsaBI R                 | <u>GCCGATACGCAT</u> CTTGTCTCCAGATCCAAGTAACTCA    | Do                                                                              |
| MS478 | GC1 F seq primer                | TGTGATCTCTATCCAACA                               | Sequencing DREB2A CDs fusion with GC1 Promoter                                  |
| MS479 | nosT R seq primer               | AACGTCATGCATTACATG                               | Sequencing presence of nosT                                                     |
| MS493 | qMAM3_F                         | CGCCATTCATTGTCATAACG                             |                                                                                 |
| MS494 | qMAM3_R                         | CATCAGCACCTCTTCAAGC                              |                                                                                 |
| MS495 | qSOT18_F                        | CCTCATCTCCAGTTTCTC                               |                                                                                 |
| MS496 | qSOT18_R                        | CATACTCGATCAGGGGCTCT                             |                                                                                 |
| MS497 | qUGT74B1_F                      | CGTTTCGTATCCGTGGCTTA                             |                                                                                 |
| MS498 | qUGT74B1_RCAGACTCACCATTTTCAATCT |                                                  |                                                                                 |

**ChIP qPCR**

|       |                 |                         |                                     |
|-------|-----------------|-------------------------|-------------------------------------|
| MS481 | MYB29 q1R       | ATAAGCCTGGCACTCGTGTAG   | ChIP around W box in MYB29 promoter |
| MS484 | MYB29 q3F       | GTCATAAACAACACTCTTGTATG | Do                                  |
| MS487 | MYB28 q2F       | GTCAGAAAGCCATGTTGCG     | ChIP around W box in MYB28 promoter |
| MS488 | MYB28 q2R       | CACCGTTTCAACCCATAATCAG  |                                     |
| MS489 | WRKY63_ChIP_q1F | CTAAATCCTCTCATAGTCTCATC | ChIP around AuxRE in IAA19 promoter |
| MS490 | WRKY63_ChIP_q1R | TCCAGATCCTTTCCCACTTCG   | Do                                  |
| MS491 | WRKY63_ChIP_q2F | GAGAAGAAGACAAGTCTACTTTT | Do                                  |
| MS492 | WRKY63_ChIP_q2R | CGAAGAACATCGGCCATGAT    | Do                                  |

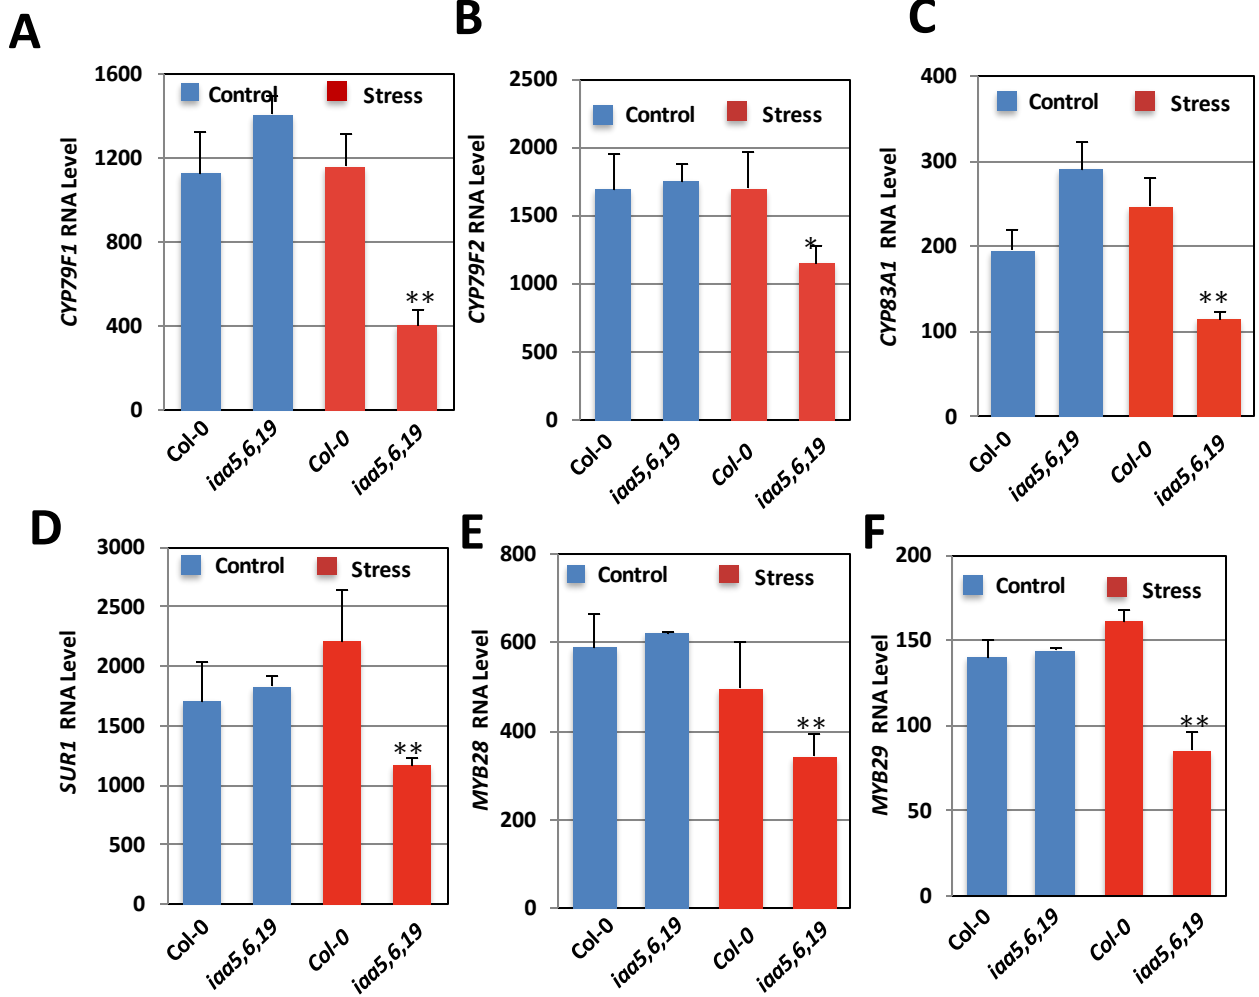

Supplementary Figure S1. **Aliphatic glucosinolate biosynthesis genes are downregulated in the *iaa5,6,19* mutant during dehydration stress.** (A) qRT PCR data showing actual RNA values of *CYP79F1*. (B) *CYP79F2*, (C) *CYP83A1*, (D) *SUR1*, (E) *MYB28*, (F) *MYB29*. For panels differences between the mutant and corresponding Col-0 control are significant at  $p < 0.05$  (\*) and  $p < 0.01$  (\*\*) by two-tailed Student's t test.

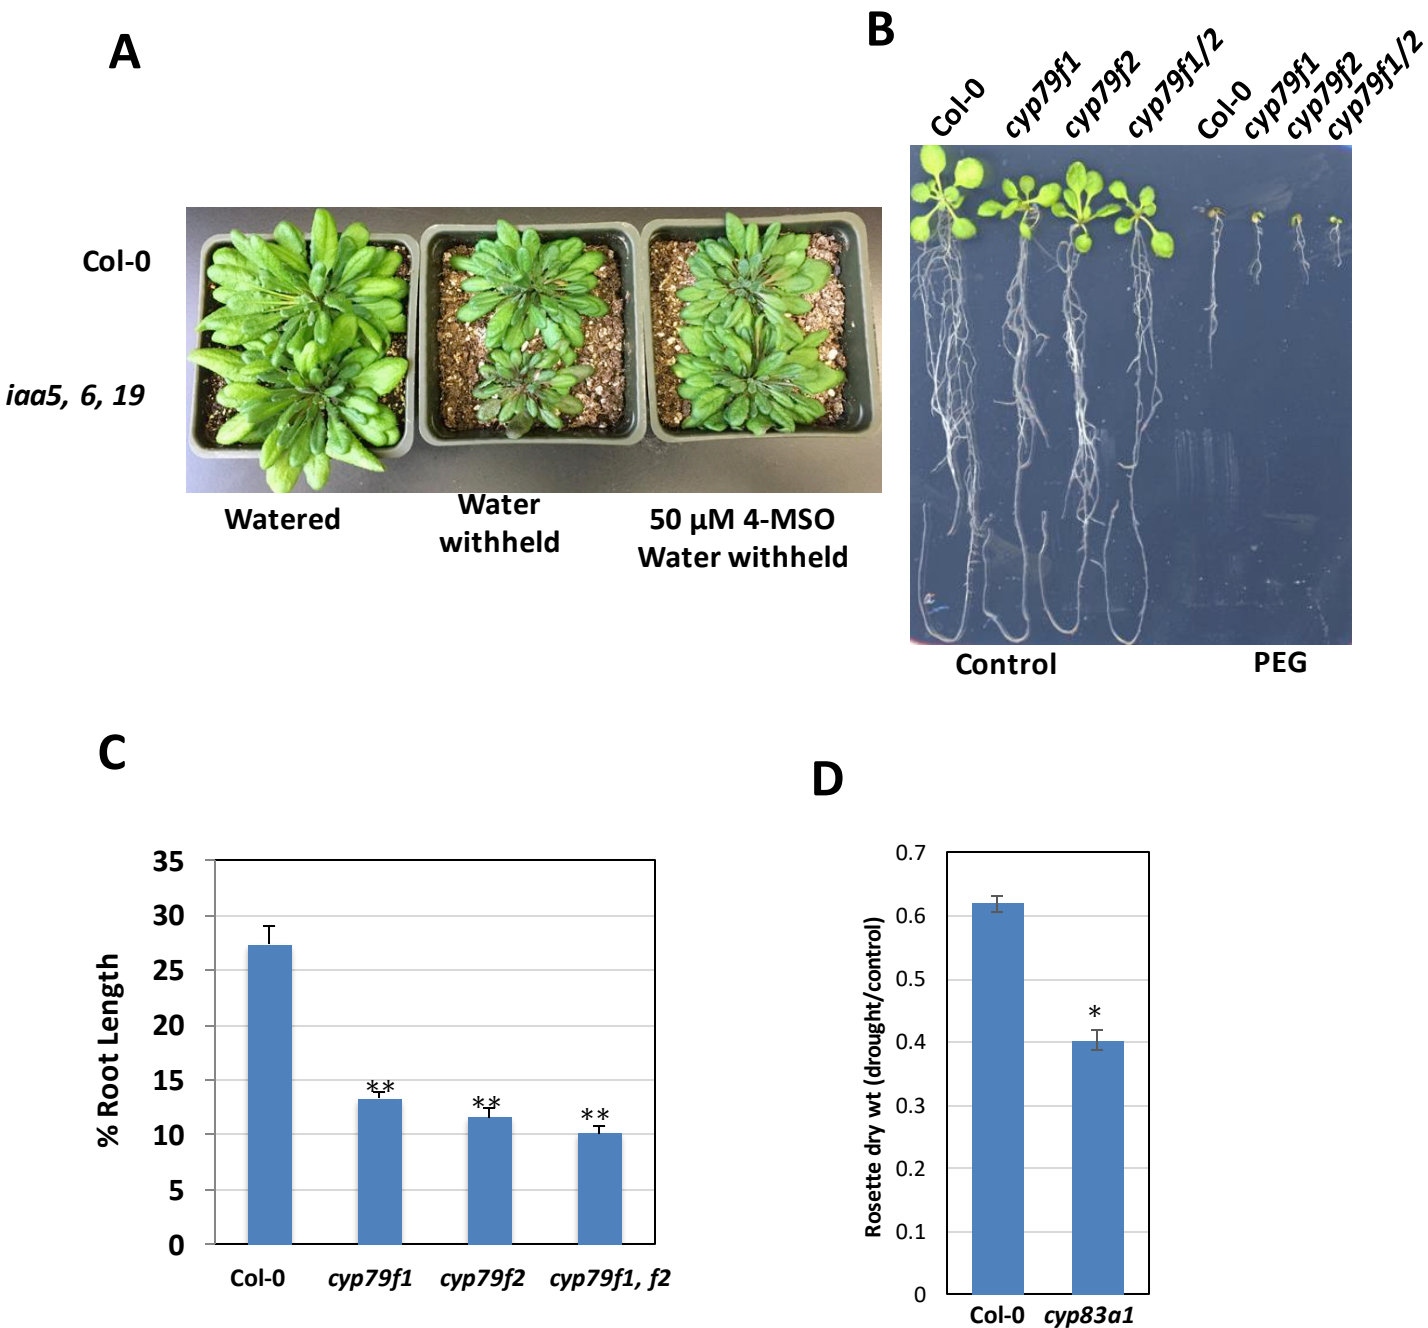

**Supplementary Figure S2. Aliphatic glucosinolate biosynthetic mutants are less tolerant of drought or dehydration.** (A) The *iaa5,6,19* triple mutant is less drought tolerant than the wild type in a water withholding experiment. (B) Representative 15-day-old *cyp79f1*, *cyp79f2* and *cyp79f1f2* seedlings after PEG stress. (C) % root length relative to growth on control medium from (B). Results are presented as the mean  $\pm$  SE of one experiments with  $n=12-15$  independent seedlings. (D) The *cyp83a1* mutant is less drought tolerant than wild type in a water withholding experiment. For (C) and (D) differences are significant at  $p < 0.05$  (\*) and  $p < 0.01$  (\*\*) by two-tailed Student's *t* test.

**A**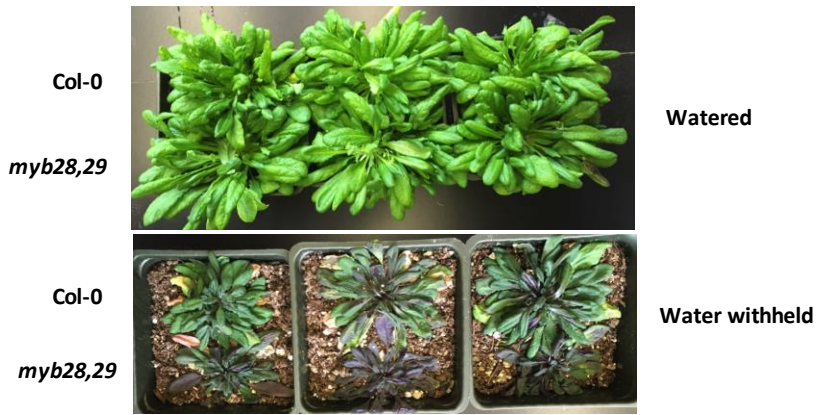**B**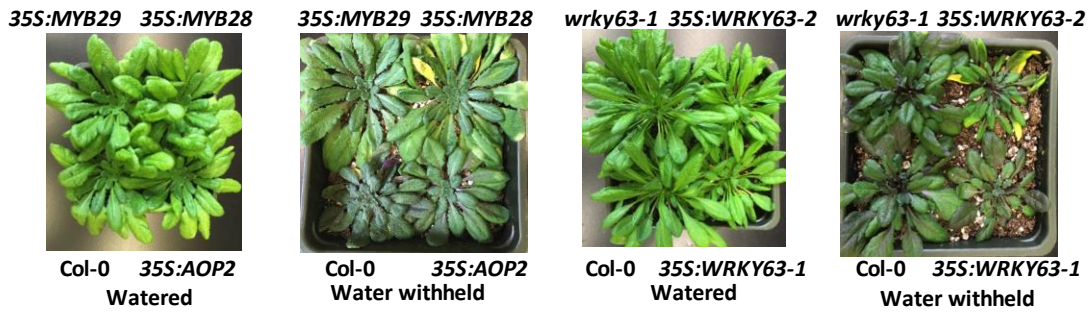**C**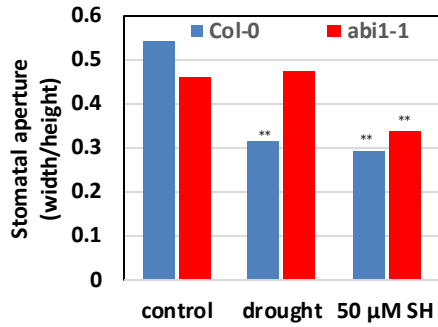**D**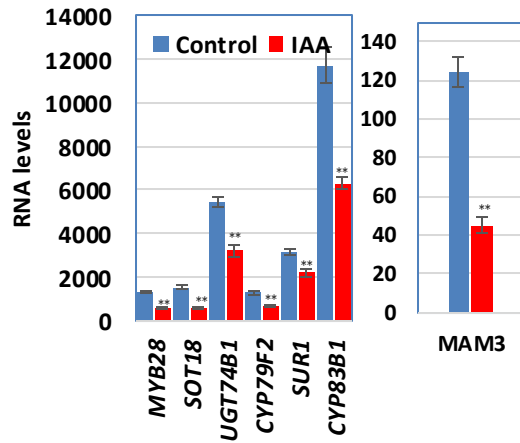**E**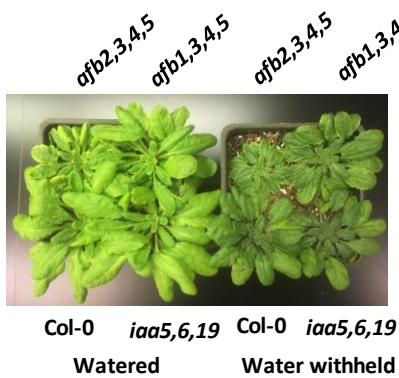

**Figure S3. Response of MYB28, MYB29, AOP2 and WRKY63 mutant and transgenic plants to water withholding.** (A) The *myb28,29* double mutant is less drought tolerant than the wild type in a water withholding experiment. (B) Overexpression of *MYB28*, *MYB29* and *AOP2* results in increased tolerance to water withholding, while *35S:WRKY63* lines are less tolerant in this assay. (C) Stomatal response of Col-0 and *abi1-1* 50  $\mu$ M sinigrin hydrate. (D) GLS biosynthetic genes are repressed by auxin treatment as shown by qPCR analysis. (E) *afb* higher order mutant plants are more drought tolerant than wild type in a water withholding experiment. Differences are significant at  $p < 0.05$  (\*) and  $p < 0.01$  (\*\*) by two-tailed Student's t test.

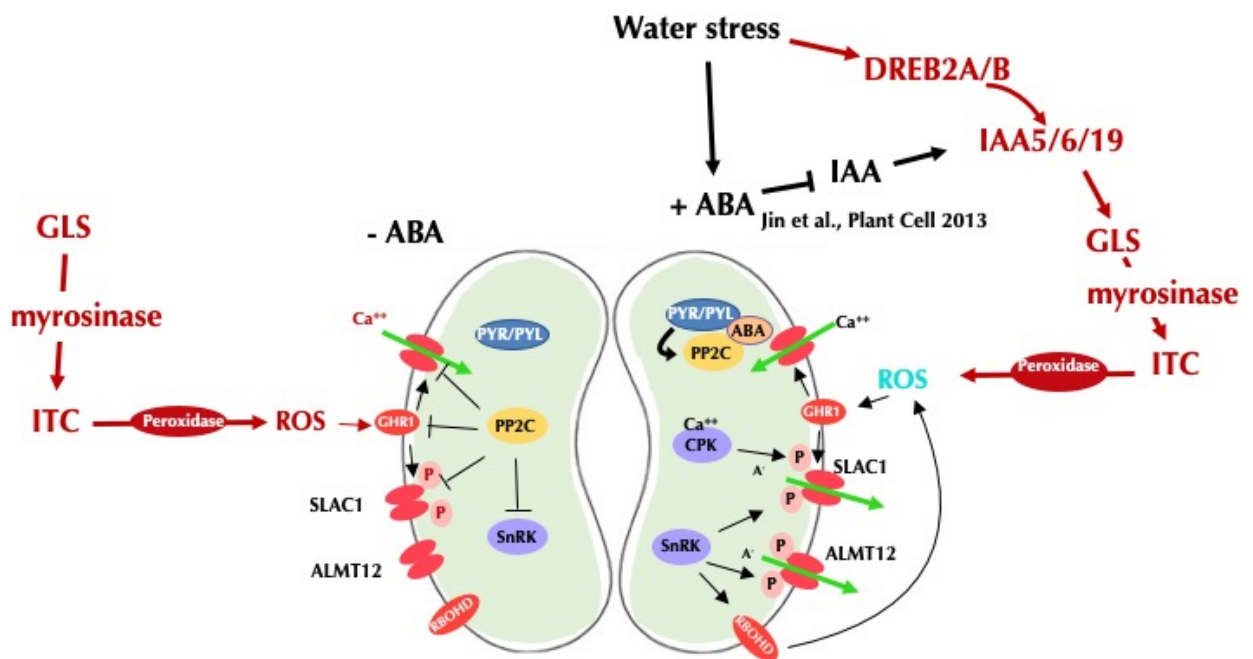

**Fig S4. A proposed model for GLS action during stomatal regulation.** Adapted from (43). GLS regulation diagramed in red. Water deficit induces DREB2A/B expression which promotes expression of IAA5/6/19 and maintenance of GLS levels. Myrosinase acts on GLS to produce isothiocyanate (ITC) which results in production of ROS via a peroxidase (44). An increase in ABA levels also results in decreased IAA levels in guard cells (45) which acts to stabilize IAA5/6/19. In the absence of water stress, GLS acts to promote stomatal closure via ROS production.
